# Supplementary material for: Bioinformatics Analysis of Global Diversity in Meningococcal Vaccine Antigens over the Past 10 Years; Vaccine Efficiency Prognosis
Source: Preprints.org preprint supplement (doi:10.20944/preprints202311.0997.v1), 2023-11-15
Supplement: Supplementary file 1 [file File XLSX S1 the prediction of 4CMenB reactivity of fHbp variants from “Insufficient data” group.xlsx]

## Sheet: Sheet1
2	cross_reactive	cross_reactive	175	175
5	cross_reactive	cross_reactive	185	185
8	cross_reactive	cross_reactive
9	cross_reactive	cross_reactive
13	cross_reactive	cross_reactive
18	none	none
23	none	none
26	none	none
27	none	none
29	none	none
34	none	none
49	none	none
54	cross_reactive	cross_reactive
55	cross_reactive	cross_reactive
61	cross_reactive	cross_reactive
62	cross_reactive	cross_reactive
66	cross_reactive	cross_reactive
69	cross_reactive	cross_reactive
74	cross_reactive	cross_reactive
82	none	none
83	none	none
84	none	none
85	none	none
86	cross_reactive	cross_reactive
87	cross_reactive	cross_reactive
89	cross_reactive	cross_reactive
90	cross_reactive	cross_reactive
94	none	none
95	none	none
96	none	none
97	none	none
99	none	none
100	cross_reactive	cross_reactive
101	none	none
102	none	none
106	none	none
108	cross_reactive	cross_reactive
109	none	none
119	none	none
123	cross_reactive	cross_reactive
125	cross_reactive	cross_reactive
134	none	none
135	cross_reactive	cross_reactive
138	none	none
141	none	none
143	none	none
147	none	none
152	none	none
160	none	none
161	none	none
165	none	none
167	none	none
170	none	none
174	none	none
180	none	none
184	none	none
185	none	none
186	none	none
187	none	none
188	none	none
189	none	none
191	none	none
197	none	none
200	none	none
202	none	none
203	none	none
207	cross_reactive	cross_reactive
208	cross_reactive	cross_reactive
210	cross_reactive	cross_reactive
213	cross_reactive	cross_reactive
216	cross_reactive	cross_reactive
218	cross_reactive	cross_reactive
220	cross_reactive	cross_reactive
224	cross_reactive	cross_reactive
225	cross_reactive	cross_reactive
226	cross_reactive	cross_reactive
227	cross_reactive	cross_reactive
228	cross_reactive	cross_reactive
232	cross_reactive	cross_reactive
233	cross_reactive	cross_reactive
235	cross_reactive	cross_reactive
236	cross_reactive	cross_reactive
243	cross_reactive	cross_reactive
245	cross_reactive	cross_reactive
246	cross_reactive	cross_reactive
249	cross_reactive	cross_reactive
252	cross_reactive	cross_reactive
256	cross_reactive	cross_reactive
257	cross_reactive	cross_reactive
260	cross_reactive	cross_reactive
261	cross_reactive	cross_reactive
269	cross_reactive	cross_reactive
275	cross_reactive	cross_reactive
276	cross_reactive	cross_reactive
278	cross_reactive	cross_reactive
280	cross_reactive	cross_reactive
283	cross_reactive	none
284	none	none
286	none	none
291	cross_reactive	cross_reactive
294	none	none
296	none	none
297	cross_reactive	cross_reactive
302	none	none
309	cross_reactive	cross_reactive
316	none	none
318	cross_reactive	cross_reactive
321	cross_reactive	cross_reactive
322	cross_reactive	cross_reactive
323	cross_reactive	cross_reactive
326	none	none
327	cross_reactive	cross_reactive
333	none	none
339	none	none
341	none	none
344	cross_reactive	cross_reactive
346	none	none
354	none	none
357	cross_reactive	cross_reactive
362	cross_reactive	cross_reactive
364	none	none
366	none	none
369	cross_reactive	cross_reactive
390	cross_reactive	cross_reactive
393	cross_reactive	cross_reactive
396	cross_reactive	cross_reactive
401	none	none
403	cross_reactive	cross_reactive
404	none	none
405	none	none
408	none	none
409	none	none
419	cross_reactive	cross_reactive
420	cross_reactive	cross_reactive
430	cross_reactive	cross_reactive
435	cross_reactive	cross_reactive
437	cross_reactive	cross_reactive
447	cross_reactive	cross_reactive
451	none	none
453	cross_reactive	cross_reactive
456	cross_reactive	cross_reactive
460	none	none
464	cross_reactive	cross_reactive
476	none	none
480	cross_reactive	cross_reactive
483	cross_reactive	cross_reactive
486	none	none
494	none	none
499	none	none
502	cross_reactive	cross_reactive
504	cross_reactive	cross_reactive
506	none	none
509	cross_reactive	cross_reactive
510	cross_reactive	cross_reactive
520	none	none
522	none	none
525	cross_reactive	cross_reactive
527	none	none
534	cross_reactive	cross_reactive
536	none	none
538	none	none
539	cross_reactive	cross_reactive
541	none	none
544	cross_reactive	cross_reactive
555	none	none
558	none	none
569	cross_reactive	cross_reactive
578	cross_reactive	cross_reactive
581	none	none
584	none	none
592	cross_reactive	cross_reactive
595	none	none
603	none	none
608	cross_reactive	cross_reactive
609	none	none
613	cross_reactive	cross_reactive
621	none	none
622	cross_reactive	cross_reactive
627	none	none
628	cross_reactive	cross_reactive
642	none	none
649	cross_reactive	cross_reactive
650	cross_reactive	cross_reactive
651	none	none
654	cross_reactive	cross_reactive
677	cross_reactive	cross_reactive
680	cross_reactive	cross_reactive
683	none	none
685	none	cross_reactive
686	none	none
690	cross_reactive	cross_reactive
697	cross_reactive	cross_reactive
698	none	none
700	cross_reactive	cross_reactive
702	cross_reactive	cross_reactive
704	cross_reactive	cross_reactive
705	cross_reactive	cross_reactive
713	cross_reactive	cross_reactive
714	cross_reactive	cross_reactive
715	none	none
727	none	none
728	none	cross_reactive
733	none	none
737	none	none
738	cross_reactive	cross_reactive
740	none	none
762	cross_reactive	cross_reactive
763	cross_reactive	cross_reactive
765	cross_reactive	cross_reactive
785	cross_reactive	cross_reactive
801	none	none
806	none	none
814	none	none
822	cross_reactive	cross_reactive
823	cross_reactive	cross_reactive
824	none	none
825	cross_reactive	cross_reactive
826	none	none
827	cross_reactive	cross_reactive
828	cross_reactive	cross_reactive
829	cross_reactive	cross_reactive
830	cross_reactive	cross_reactive
831	cross_reactive	cross_reactive
846	none	none
850	none	none
853	none	none
882	none	cross_reactive
883	cross_reactive	cross_reactive
885	none	none
887	cross_reactive	cross_reactive
888	none	none
889	cross_reactive	cross_reactive
890	cross_reactive	cross_reactive
891	none	none
893	cross_reactive	cross_reactive
894	none	none
897	none	none
903	cross_reactive	cross_reactive
904	cross_reactive	cross_reactive
906	none	none
908	cross_reactive	cross_reactive
909	cross_reactive	cross_reactive
910	cross_reactive	cross_reactive
911	cross_reactive	cross_reactive
927	cross_reactive	none
930	none	none
931	cross_reactive	cross_reactive
937	none	none
950	none	none
951	cross_reactive	cross_reactive
952	none	none
953	none	none
954	cross_reactive	cross_reactive
955	none	none
956	none	none
958	cross_reactive	cross_reactive
965	none	none
969	none	none
975	cross_reactive	cross_reactive
978	cross_reactive	cross_reactive
979	cross_reactive	cross_reactive
984	none	none
986	none	none
989	none	none
1001	cross_reactive	cross_reactive
1008	none	none
1010	none	none
1022	none	none
1024	cross_reactive	cross_reactive
1028	none	none
1045	cross_reactive	cross_reactive
1056	cross_reactive	cross_reactive
1059	cross_reactive	cross_reactive
1064	none	none
1068	none	none
1070	cross_reactive	cross_reactive
1071	cross_reactive	cross_reactive
1072	cross_reactive	cross_reactive
1075	cross_reactive	none
1076	cross_reactive	cross_reactive
1077	cross_reactive	cross_reactive
1078	none	none
1079	none	none
1080	cross_reactive	cross_reactive
1081	none	none
1082	none	none
1100	none	none
1113	none	none
1114	none	none
1115	none	none
1117	cross_reactive	cross_reactive
1119	none	none
1121	none	none
1130	none	none
1132	cross_reactive	cross_reactive
1134	cross_reactive	cross_reactive
1144	none	none
1148	none	none
1149	cross_reactive	cross_reactive
1150	cross_reactive	cross_reactive
1157	cross_reactive	cross_reactive
1160	cross_reactive	cross_reactive
1161	cross_reactive	cross_reactive
1163	none	none
1165	none	none
1166	none	none
1167	none	none
1168	cross_reactive	cross_reactive
1169	cross_reactive	cross_reactive
1171	cross_reactive	cross_reactive
1177	none	none
1185	none	none
1204	cross_reactive	cross_reactive
1207	none	none
1217	none	none
1218	none	none
1224	cross_reactive	cross_reactive
1228	none	none
1244	none	none
1245	none	none
1248	cross_reactive	none
1249	cross_reactive	cross_reactive
1252	cross_reactive	cross_reactive
1253	cross_reactive	cross_reactive
1257	none	none
1285	cross_reactive	cross_reactive
1298	none	none
1313	cross_reactive	cross_reactive
1317	cross_reactive	cross_reactive
1319	none	none
1320	none	none
1321	cross_reactive	cross_reactive
1322	cross_reactive	cross_reactive
1323	none	none
1324	cross_reactive	cross_reactive
1326	none	cross_reactive
1328	none	none
1332	none	none
1335	none	none
1337	none	none
1350	cross_reactive	cross_reactive
1354	none	none
1355	cross_reactive	cross_reactive
1357	cross_reactive	cross_reactive
1360	cross_reactive	cross_reactive
1361	cross_reactive	cross_reactive
1362	cross_reactive	cross_reactive
1367	cross_reactive	cross_reactive
1380	none	none
1382	none	none
1383	none	none
1384	cross_reactive	cross_reactive
1386	cross_reactive	cross_reactive
1394	cross_reactive	cross_reactive
1402	none	none
1403	cross_reactive	cross_reactive
1404	none	none
1405	none	none
1413	none	none
1419	none	none
	one-hot-encoding	label-encoding
