# Supplementary material for: Bioinformatics Analysis of Global Diversity in Meningococcal Vaccine Antigens over the Past 10 Years; Vaccine Efficiency Prognosis
Source: Preprints.org preprint supplement (doi:10.20944/preprints202311.0997.v1), 2023-11-15
Supplement: Supplementary file 2 [file File XLSX S2 combination of fHbp and NHBA variants in isolates genomes.xlsx]

## Sheet: Combinations
isolate	fHbp_peptide	NHBA_peptide	Frequency	Percentage
SCLN202101	-	-	7	0.12
2200554	-	29	2	0.04
21072	16	306	1	0.02
M21 240235 VO P2	4	2	1	0.02
22-465-MEN	37	6	1	0.02
61370	16	21	1	0.02
15 8704767	13	117	1	0.02
CHB066	14	160	1	0.02
NML2019-176	106	6	1	0.02
NML2020-102	13	20	1	0.02
50325	1380	6	1	0.02
LNP27462	510	29	1	0.02
M16 240888	15	21	1	0.02
CA42717	13	960	1	0.02
TRI-90	16	796	1	0.02
Men20B1	4	2	1	0.02
M17 240841	86	2	1	0.02
M41030	13	114	1	0.02
M14 240533	4	25	1	0.02
M13 240042	16	6	1	0.02
64402	-	3	1	0.02
M17 240622	15	21	1	0.02
M13 240032	4	29	1	0.02
M43852	16	21	1	0.02
TRI-9	16	513	1	0.02
NML2021-036	16	21	1	0.02
LNP28384	13	24	1	0.02
M13 240001	4	190	1	0.02
61251	16	3	1	0.02
NML2013-171	14	2	1	0.02
23MN0015	15	21	1	0.02
Nm040Nei033T1-1	16	669	1	0.02
M2001 043	1335	6	1	0.02
13.7896.B	37	6	1	0.02
22961	13	20	1	0.02
2582	16	160	1	0.02
NML2022-074	90	6	1	0.02
2160994	1	220	1	0.02
M13 240234	4	2	1	0.02
Nmiss3355	-	6	1	0.02
M16 240780	16	593	1	0.02
0070/15	16	21	1	0.02
M41519	1	5	1	0.02
M19 240482	16	26	1	0.02
M18 240326	4	2	1	0.02
M44965	18	1322	1	0.02
52891	16	20	1	0.02
M14 240093	37	6	1	0.02
NML2022-021	4	1762	1	0.02
M21 240235 ShSp P2a	4	2	1	0.02
50149	13	1720	1	0.02
Nm394	16	688	1	0.02
LNP27458	1	20	1	0.02
CHB088	252	6	1	0.02
M14 240637	37	6	1	0.02
IE18Nm09	16	306	1	0.02
2183087	1	220	1	0.02
Nm395	16	910	1	0.02
71/2014	197	114	1	0.02
M40203	18	945	1	0.02
CR88O	4	21	1	0.02
M37339	510	29	1	0.02
NM000067	16	669	1	0.02
M49619	18	945	1	0.02
Nm040Nei012T1n-3	16	669	1	0.02
M16 240301	16	20	1	0.02
W-5573	15	221	1	0.02
LNP28530	510	29	1	0.02
20-100-MEN	37	6	1	0.02
48357	16	3	1	0.02
0032/19	37	6	1	0.02
22-477-MEN	37	6	1	0.02
0013/18	37	6	1	0.02
SMG-19-384	144	20	1	0.02
P80	184	6	1	0.02
CHB0104	252	6	1	0.02
0047/17	37	6	1	0.02
M19 240485	4	2	1	0.02
NMLB034	13	24	1	0.02
BT18224V3C2	16	21	1	0.02
M38901	16	950	1	0.02
M29258	14	2	1	0.02
IE15Nm34	16	20	1	0.02
Nm040Nei012T1n-2	16	669	1	0.02
Nm040_Nei082_T3	16	669	1	0.02
M41671	1	5	1	0.02
NM000039	16	669	1	0.02
M22 240041	69	286	1	0.02
M16 240628	785	29	1	0.02
M13 240695	785	20	1	0.02
IPM142	-	3	1	0.02
C20504	-	6	1	0.02
M14 240434	15	21	1	0.02
NML061	15	21	1	0.02
25	13	24	1	0.02
DZ14	-	6	1	0.02
AK-1904	16	21	1	0.02
M44664	1	3	1	0.02
M22 240138	4	2	1	0.02
NML2022-063	106	6	1	0.02
2621	197	114	1	0.02
LNP28656	13	6	1	0.02
M47487	16	669	1	0.02
IPM21	1	1181	1	0.02
UNI-129	16	21	1	0.02
Nm390	16	910	1	0.02
22MN0111	456	20	1	0.02
NML2022-075	90	6	1	0.02
DE14466	12	1641	1	0.02
M26374	276	2	1	0.02
M21 240215 ShSp P2b	16	24	1	0.02
49367	26	1718	1	0.02
21-675	405	357	1	0.02
0087/15	37	6	1	0.02
M17 240176	4	2	1	0.02
18005	106	6	1	0.02
22MN0109	4	2	1	0.02
M15 240307	37	6	1	0.02
51947	16	3	1	0.02
NML2018-016	1134	2	1	0.02
M42458	16	669	1	0.02
M27892	14	2	1	0.02
M17 240183	13	20	1	0.02
Nm040Nei798T1-1	16	669	1	0.02
M47893	14	2	1	0.02
Nm040Nei1004T1-1	16	669	1	0.02
AK-2041_Str	1	376	1	0.02
M41684	16	21	1	0.02
DE14117	37	6	1	0.02
DE14754	34	6	1	0.02
Nm040Nei171T1-1	16	669	1	0.02
150M	14	939	1	0.02
NML2020-047	316	21	1	0.02
M13 240424	37	6	1	0.02
LNP27297	16	21	1	0.02
IE18Nm12	4	2	1	0.02
0092/16	296	81	1	0.02
IE13Nm24	16	20	1	0.02
M16 240398	4	943	1	0.02
NM000063	260	20	1	0.02
M15 240037	890	6	1	0.02
M15 240043	1	187	1	0.02
2172049	333	1468	1	0.02
M18 240653	37	6	1	0.02
Nm040Nei798T1-4	16	669	1	0.02
17-275	15	21	1	0.02
M14 240201	143	-	1	0.02
DE14491	37	6	1	0.02
22087	16	306	1	0.02
M16 240874	37	6	1	0.02
M18 240108	16	21	1	0.02
M22 240141	16	119	1	0.02
M18 240202	4	7	1	0.02
M22 240078	224	3	1	0.02
M15 240863	16	145	1	0.02
22-517-MEN	37	6	1	0.02
14-8706349	37	6	1	0.02
0065/16	13	6	1	0.02
114794	499	253	1	0.02
M21 240177 ShSp P2b	143	21	1	0.02
M22 240074	224	3	1	0.02
NML2018-028	1144	6	1	0.02
NML2022-007	13	24	1	0.02
LNP28660	16	21	1	0.02
22108	698	2	1	0.02
LNP28880	321	243	1	0.02
22812	16	21	1	0.02
22361	37	6	1	0.02
M16 240795	200	6	1	0.02
M16 240243	1	-	1	0.02
IE19Nm35	4	2	1	0.02
W21157	16	20	1	0.02
NML2022-030	4	2	1	0.02
M13 240526	16	-	1	0.02
M29621	16	669	1	0.02
M22 240023 VO P2	4	2	1	0.02
SMG-21-500	37	6	1	0.02
LNP28592	125	6	1	0.02
DE14516	321	243	1	0.02
Nmiss3168	13	20	1	0.02
M43199	125	6	1	0.02
Nm040Nei028T1n-3	16	669	1	0.02
DE14410	15	21	1	0.02
M43851	1	5	1	0.02
22539	102	58	1	0.02
M44837	16	669	1	0.02
0015/16	37	180	1	0.02
M22 240021 ShSp P1a2	4	2	1	0.02
ST40755	4	21	1	0.02
M14 240333	829	-	1	0.02
M16 240669	979	949	1	0.02
15-8708164	950	114	1	0.02
N.m066	37	6	1	0.02
1406100215	965	-	1	0.02
DE14553	141	1644	1	0.02
M50498	106	6	1	0.02
M21 240181 VO P2	13	24	1	0.02
M17 240101	16	3	1	0.02
20-108-MEN	37	6	1	0.02
M14 240273	62	3	1	0.02
M18 240225	510	29	1	0.02
M17 240497	37	6	1	0.02
19-708-1	16	21	1	0.02
M15 240196	15	21	1	0.02
27	16	21	1	0.02
17-107	4	2	1	0.02
AK-2037_Str	13	24	1	0.02
W-5969	1	376	1	0.02
IPM3	1	3	1	0.02
Nmiss3337	37	6	1	0.02
13.4278.S	4	2	1	0.02
23MN0031	16	129	1	0.02
NMLB006	4	2	1	0.02
22574	16	306	1	0.02
NML2023-049	344	6	1	0.02
C10504	-	6	1	0.02
IPM10	1	3	1	0.02
19-591-MEN	321	243	1	0.02
Nm_28-023	23	367	1	0.02
159M	16	21	1	0.02
M16 240423	4	-	1	0.02
Nmiss3176	37	6	1	0.02
M21 240196 VO P2	1	3	1	0.02
2751	14	160	1	0.02
M19 240056	321	243	1	0.02
M22 240023 ShSp P2a	4	2	1	0.02
IE17Nm53	4	2	1	0.02
PR40494	16	10	1	0.02
LNP27567	14	2	1	0.02
M19 240557	86	2	1	0.02
2935	390	20	1	0.02
NZ18MI0035	4	2	1	0.02
M22 240110	15	21	1	0.02
2141605	15	21	1	0.02
M41780	16	21	1	0.02
M19 240192	4	2	1	0.02
DE14771	119	20	1	0.02
M21 240215 VO P2	16	24	1	0.02
UNI-739	16	21	1	0.02
Nm397	16	910	1	0.02
DE14159	1	9	1	0.02
23MN0002	4	2	1	0.02
0024/20	13	9	1	0.02
DE14357	15	21	1	0.02
DE14755	13	9	1	0.02
BM-1258	1168	9	1	0.02
M21 240215 ShSp P2a	16	24	1	0.02
DE13263	15	21	1	0.02
M22 240029 ShSp P2a	16	21	1	0.02
TRI-346	286	9	1	0.02
M18 240059	69	286	1	0.02
IE13Nm07	16	20	1	0.02
LNP28485	14	2	1	0.02
M22 240023 ShSp P1a2	4	2	1	0.02
DE13285	15	21	1	0.02
53494	16	21	1	0.02
M20 240099	1360	2	1	0.02
Nm408	5	9	1	0.02
NML2023-006	4	2	1	0.02
Nm075	5	9	1	0.02
22MN0034	1	3	1	0.02
2171789	14	1470	1	0.02
M14 240265	15	21	1	0.02
M13 240090	14	2	1	0.02
M16 240496	15	21	1	0.02
16-8700524	14	9	1	0.02
DE14124	15	21	1	0.02
NML2020-032	16	21	1	0.02
M29123	910	5	1	0.02
M22 240125	510	1743	1	0.02
M17 240195	15	20	1	0.02
M19 240120	4	2	1	0.02
M18 240168	1	255	1	0.02
53319	16	3	1	0.02
M52675	1	5	1	0.02
M19 240391	1	3	1	0.02
Nm040Nei171T1-3	16	669	1	0.02
82/2013	1	3	1	0.02
NMFJ201702	16	910	1	0.02
M27506	13	114	1	0.02
Nm409	5	9	1	0.02
107484	4	9	1	0.02
M16 240548	16	3	1	0.02
M14 240480	1	187	1	0.02
M51575	1244	2	1	0.02
DE14511	4	111	1	0.02
Nmiss3081	59	118	1	0.02
M21 240188 ShSp P2a	106	122	1	0.02
15-8708102	13	114	1	0.02
W-5889a	15	21	1	0.02
Nm040Nei341T1-2	16	669	1	0.02
2180633	510	29	1	0.02
2180272	494	115	1	0.02
47	1	3	1	0.02
M20 240190	16	29	1	0.02
M19 240057	321	243	1	0.02
AK-1896	15	9	1	0.02
DE14607	69	3	1	0.02
2161796_II	1	220	1	0.02
DE14671	16	21	1	0.02
M41831	1	3	1	0.02
Nm040Nei341T1-1	16	669	1	0.02
M13 240120	4	2	1	0.02
WG40058	13	118	1	0.02
NIID757	18	1660	1	0.02
M15 240252	16	802	1	0.02
M22 240127	-	13	1	0.02
DE14642	1	3	1	0.02
M20 240286	15	21	1	0.02
M39149	16	21	1	0.02
LNP27451	16	20	1	0.02
M16 240521	341	20	1	0.02
NMFJ201701	16	910	1	0.02
M19 240261	100	649	1	0.02
Nm040Nei028T1n-2	16	669	1	0.02
M16 240774	16	24	1	0.02
M15 240698	13	17	1	0.02
IE18Nm60	4	2	1	0.02
M40977	13	114	1	0.02
M20 240004	13	17	1	0.02
17-492-MEN	69	20	1	0.02
M40878	89	26	1	0.02
107515	135	46	1	0.02
M18 240239	13	17	1	0.02
M13 240069	13	17	1	0.02
DE14300	-	29	1	0.02
0011/19	16	21	1	0.02
M18 240242	15	21	1	0.02
UNI-438	16	161	1	0.02
UNI-608	16	21	1	0.02
NML2022-017	4	2	1	0.02
M19 240231	202	17	1	0.02
M22 240024 VO P1	4	-	1	0.02
M17 240206	13	17	1	0.02
M17 240147	13	17	1	0.02
M18 240462	1008	3	1	0.02
M19 240535	733	2	1	0.02
M21 240179 VO P1	215	20	1	0.02
M21 240215	16	24	1	0.02
62557	16	3	1	0.02
14-8704743	13	17	1	0.02
20-471-MEN	16	21	1	0.02
M15 240240	13	17	1	0.02
M13 240007	704	2	1	0.02
M14 240110	14	2	1	0.02
M19 240473	13	17	1	0.02
M19 240019	16	129	1	0.02
M13 240386	87	17	1	0.02
IE14Nm47	4	-	1	0.02
M14 240233	186	2	1	0.02
Nm040_Nei110_T3	16	669	1	0.02
M13 240624	4	761	1	0.02
2201871	16	129	1	0.02
0041/18	16	21	1	0.02
M14 240365	187	118	1	0.02
Nm040Nei367T1-1	16	669	1	0.02
TRI-460	16	21	1	0.02
M22 240123	13	17	1	0.02
M19 240638	4	2	1	0.02
LNP27598	144	20	1	0.02
IE16Nm50	4	2	1	0.02
LNP28520	4	2	1	0.02
IPM138	1	1210	1	0.02
M21 240215 ShSp P2b2	16	24	1	0.02
M16 240892	13	17	1	0.02
M14 240353	4	2	1	0.02
2	1	3	1	0.02
DE14669	16	21	1	0.02
EF-403	16	669	1	0.02
M20 240045	13	17	1	0.02
23MN0025	16	119	1	0.02
NZ22MI0023	13	20	1	0.02
M41923	1	5	1	0.02
M19 240055	16	21	1	0.02
21-66-MEN	16	21	1	0.02
EXNM767	339	2	1	0.02
IPM104	-	3	1	0.02
M15 240076	727	17	1	0.02
Nm040_Nei343_T3	16	669	1	0.02
M21 240160	144	20	1	0.02
Nm398	16	910	1	0.02
2191408_1	14	24	1	0.02
NML2015-055	4	2	1	0.02
P82	4	10	1	0.02
M14 240465	13	17	1	0.02
IE13Nm29	4	607	1	0.02
15-431	13	928	1	0.02
M13 240030	13	17	1	0.02
M17 240500	4	2	1	0.02
M14 240251	700	20	1	0.02
M41051	1	5	1	0.02
M17 240119	109	20	1	0.02
66397	685	3	1	0.02
M36581	1	5	1	0.02
M13 240613	4	-	1	0.02
M40918	978	3	1	0.02
UNI-841	16	21	1	0.02
65283	-	312	1	0.02
M17 240499	4	943	1	0.02
Nm436	16	697	1	0.02
IE15Nm30	37	1259	1	0.02
SMG_17_970	16	21	1	0.02
M18 240275	4	2	1	0.02
M15 240229	16	21	1	0.02
NML2020-072F	4	2	1	0.02
M52312	16	21	1	0.02
M25867	1	5	1	0.02
19	16	21	1	0.02
M13 240017	1	3	1	0.02
Nm040_Nei042_T3	16	669	1	0.02
DE14512	13	24	1	0.02
NZ18MI0065	224	3	1	0.02
M15 240321	110	17	1	0.02
M21 240177 ShSp P2a	143	21	1	0.02
M47483	16	1508	1	0.02
LNP28602	16	2	1	0.02
Nm040Nei341T1-3	16	669	1	0.02
M17 240559	13	17	1	0.02
EXNM836	727	2	1	0.02
M19 240345	354	3	1	0.02
67/2014	510	29	1	0.02
M16 240541	15	21	1	0.02
12010_2013	16	21	1	0.02
M37343	1	5	1	0.02
0064/15	16	21	1	0.02
Nmiss3207	390	29	1	0.02
M15 240555	13	17	1	0.02
M18 240322	4	2	1	0.02
0045/18	1321	21	1	0.02
151M	14	29	1	0.02
M13 240161	16	21	1	0.02
M19 240073	327	17	1	0.02
M13 240067	15	17	1	0.02
CA44362	13	17	1	0.02
M29605	1	5	1	0.02
M20 240179	215	20	1	0.02
DE14220	584	20	1	0.02
M22 240029 ShSp P1a2	16	21	1	0.02
NML2018-139	15	21	1	0.02
M21 240172	1	17	1	0.02
M15 240541B	13	17	1	0.02
18-8k-MEN	16	21	1	0.02
M14 240449b	14	2	1	0.02
NMLB157	4	2	1	0.02
M20 240267	558	191	1	0.02
PR40239	13	17	1	0.02
NMLB126	13	24	1	0.02
Nmiss3166	420	2	1	0.02
IE16Nm66	143	21	1	0.02
M29610	16	21	1	0.02
M15 240337	4	2	1	0.02
IE13Nm47	4	-	1	0.02
LNP29633	321	243	1	0.02
23MN0011	16	119	1	0.02
M15 240014	13	17	1	0.02
M13 240086	16	306	1	0.02
14-8704599	13	114	1	0.02
M16 240838	4	2	1	0.02
M18 051108	16	669	1	0.02
DE14620	510	29	1	0.02
Nm040Nei264T1-2	16	669	1	0.02
TRI-522	16	21	1	0.02
0003/18	16	1734	1	0.02
Nm424	16	144	1	0.02
M13 240005	15	21	1	0.02
C20698	13	114	1	0.02
M22 240058	13	17	1	0.02
3-07002	650	949	1	0.02
M22 240029	16	21	1	0.02
M21 240215 ShSp P1a2	16	24	1	0.02
M18 240267	16	21	1	0.02
Nm040Nei367T1-2	16	669	1	0.02
15-8702724	4	2	1	0.02
2559	13	114	1	0.02
2200919	224	3	1	0.02
AK-1911	4	2	1	0.02
M19 240389	16	26	1	0.02
2181198	486	2	1	0.02
M17 240128	1	3	1	0.02
2191045	14	24	1	0.02
M14 240325	824	17	1	0.02
DZ11	14	2	1	0.02
ST41465	16	129	1	0.02
M19 240461	16	306	1	0.02
M46296	16	1499	1	0.02
M39089	14	2	1	0.02
M17 240096	1	3	1	0.02
23MN0008	4	2	1	0.02
H09-EMI-001	1423	17	1	0.02
0125/17	16	306	1	0.02
22589	94	17	1	0.02
Nm435	16	910	1	0.02
M15 240859	13	17	1	0.02
M18 240339	13	17	1	0.02
19-708-2	16	21	1	0.02
LNP27557	453	20	1	0.02
M20 240137	260	20	1	0.02
M16 240125	110	118	1	0.02
DE14543	16	2	1	0.02
DE14613	4	-	1	0.02
M19 240006	13	17	1	0.02
M13 240033	13	17	1	0.02
M16 240292	13	17	1	0.02
BT18279V3C	16	3	1	0.02
Nm040Nei012T1-6	16	669	1	0.02
2193334	13	17	1	0.02
M18 240010	4	2	1	0.02
M14 240261	13	17	1	0.02
M18 240250	4	643	1	0.02
M29678	1	5	1	0.02
P121	16	21	1	0.02
M13 240453	15	21	1	0.02
LNP28672	510	29	1	0.02
2201818-II	89	17	1	0.02
DE14437	16	21	1	0.02
BM-1394	13	24	1	0.02
LNP27571	1	3	1	0.02
NZ18MI0039	16	21	1	0.02
M22 240029 VO P2	16	21	1	0.02
M16 240732	4	2	1	0.02
15-256-MEN	14	2	1	0.02
M38511	1	863	1	0.02
Nm040Nei033T1-2	16	669	1	0.02
0038/18	464	2	1	0.02
LNP28395	16	20	1	0.02
LNP27313	1	3	1	0.02
M20 240078	13	17	1	0.02
M17 240627	15	21	1	0.02
W-5316	1	376	1	0.02
M19 240580	13	17	1	0.02
M20 240080	13	17	1	0.02
M22 240029 ShSp P2b	16	21	1	0.02
50509	16	21	1	0.02
M20 240288	4	2	1	0.02
M13 240085	167	670	1	0.02
M16 240390	13	17	1	0.02
M13 240227	13	17	1	0.02
M16 240262	683	255	1	0.02
DE14427	14	2	1	0.02
M42382	13	114	1	0.02
M44900	16	707	1	0.02
TRI-667	16	21	1	0.02
M19 240017	14	471	1	0.02
22073	228	17	1	0.02
M15 240497	4	2	1	0.02
H12-EMI-012	1	17	1	0.02
M21 240081	1	3	1	0.02
EF-337	16	21	1	0.02
2172488	14	2	1	0.02
M13 240742	13	17	1	0.02
W-5376	119	24	1	0.02
M16 240209	4	2	1	0.02
2172155_I	1	220	1	0.02
0090/15	1	3	1	0.02
M15 240901	13	17	1	0.02
PL40213	13	17	1	0.02
52/2013	1	3	1	0.02
M27689	16	3	1	0.02
NIID650	18	20	1	0.02
M15 240641	13	17	1	0.02
TRI-515	714	255	1	0.02
22-18-MEN	321	89	1	0.02
H09-EMI-010	16	20	1	0.02
UNI-850	16	835	1	0.02
M15 240763	16	306	1	0.02
M16 240822	13	17	1	0.02
Nm040Nei341T1-4	16	669	1	0.02
M14 240055	4	2	1	0.02
M19 240188	16	101	1	0.02
NML2018-134	13	17	1	0.02
M17 240531	4	2	1	0.02
M17 240037	-	17	1	0.02
M14 240329	785	20	1	0.02
W-5731	16	21	1	0.02
M19 240476	13	17	1	0.02
H14-RESP-012	16	465	1	0.02
M21 240126	13	118	1	0.02
LNP27631	1	255	1	0.02
Nm465	16	688	1	0.02
NIID767	18	1660	1	0.02
NIID781	16	1716	1	0.02
M46355	16	707	1	0.02
M17 240404	14	17	1	0.02
M22 240029 VO P2a	16	21	1	0.02
M53540	13	114	1	0.02
NM10052	13	17	1	0.02
M18 240463	13	25	1	0.02
0016/18	15	21	1	0.02
Nmiss3204	346	24	1	0.02
DE14407	119	24	1	0.02
55672	16	21	1	0.02
H14-RESP-025	16	145	1	0.02
M15 240912	13	17	1	0.02
LNP27496	15	21	1	0.02
DE14372	100	649	1	0.02
107516	135	46	1	0.02
IE14Nm43	14	17	1	0.02
M18 240539	170	17	1	0.02
12042-13	16	21	1	0.02
H09-EMI-011	16	20	1	0.02
M18 240365	16	1070	1	0.02
0055/18	18	304	1	0.02
M14 240342	1	187	1	0.02
M13 240264	13	114	1	0.02
M13 240261	4	2	1	0.02
CHB057	13	17	1	0.02
18-766-MEN	13	25	1	0.02
NML003	15	21	1	0.02
M18 240226	4	2	1	0.02
CA44266	13	17	1	0.02
M21 240215 ShSp P2a3	16	24	1	0.02
M48008	16	19	1	0.02
Nm376	16	669	1	0.02
NIID764	510	29	1	0.02
23MN0003	13	17	1	0.02
Nm479	16	910	1	0.02
M16 240886	4	2	1	0.02
22442	13	17	1	0.02
NM10053	13	17	1	0.02
M18 240548	1	17	1	0.02
55543	13	1720	1	0.02
H09-EMI-004	16	161	1	0.02
2211364	1	220	1	0.02
M16 240519	13	17	1	0.02
LNP27555	14	-	1	0.02
M26020	16	21	1	0.02
M15 240075	4	2	1	0.02
M22 240021 ShSp P2a3	4	2	1	0.02
M15 240857	316	118	1	0.02
M39224	1	5	1	0.02
LNP27348	14	160	1	0.02
Nmiss3345	260	20	1	0.02
M13 240271	494	129	1	0.02
M19 240457	13	24	1	0.02
M22 240001	4	2	1	0.02
AK-2172	-	-	1	0.02
M37479	224	316	1	0.02
DE14643	1	3	1	0.02
M13 240737	13	763	1	0.02
M14 240030	13	-	1	0.02
2180798	1	220	1	0.02
2938	510	29	1	0.02
2190451	14	129	1	0.02
Nm040Nei033T1-3	16	669	1	0.02
Nmiss3181.fasta	823	20	1	0.02
M40156	16	669	1	0.02
92Mo	16	21	1	0.02
2182322	1	187	1	0.02
M22 240029 VO P1	16	21	1	0.02
M38641	23	5	1	0.02
C20405	23	130	1	0.02
M18 240362	13	17	1	0.02
LNP27321	16	21	1	0.02
TRI-150	16	21	1	0.02
LNP28491	510	29	1	0.02
16-8704285	4	2	1	0.02
M21 240215 VO P2a	16	24	1	0.02
M13 240684	15	21	1	0.02
TRI-653	16	21	1	0.02
CA41993	16	21	1	0.02
M14 240539	61	17	1	0.02
DE14302	16	24	1	0.02
15-230-MEN	16	21	1	0.02
M43850	16	21	1	0.02
M16 240145	13	17	1	0.02
M13 240605	13	17	1	0.02
M18 240256	16	20	1	0.02
C20272	119	24	1	0.02
20-51-MEN	16	21	1	0.02
M40320	1	5	1	0.02
M14 240039	4	-	1	0.02
M43859	510	29	1	0.02
M22 240129	510	29	1	0.02
LNP28302	4	2	1	0.02
M17 240034	4	2	1	0.02
DE13262	15	21	1	0.02
LNP27369	14	20	1	0.02
NMFJ201801	16	910	1	0.02
LNP27327	1077	2	1	0.02
2704	1	3	1	0.02
DE14697	16	1172	1	0.02
Nm040Nei798T1-3	16	669	1	0.02
91Mo	14	29	1	0.02
Nm040Nei1004T1-3	16	669	1	0.02
M13 240036	13	17	1	0.02
M16 240277	951	2	1	0.02
Nm473	16	910	1	0.02
Nmiss3242	14	2	1	0.02
2171599	1	94	1	0.02
53010	16	21	1	0.02
TRI-529	16	18	1	0.02
M20 240177	13	17	1	0.02
21-56-MEN	119	24	1	0.02
M14 240017	4	2	1	0.02
NML2017-017	16	21	1	0.02
2230305685	4	2	1	0.02
DE14202	16	21	1	0.02
M25952	1	5	1	0.02
Nm501	16	910	1	0.02
18-8v-MEN	16	21	1	0.02
22MN0093	13	17	1	0.02
W-6351	16	1073	1	0.02
0008/13	853	21	1	0.02
NMFJ201601	16	910	1	0.02
55	16	21	1	0.02
M15 240634	15	21	1	0.02
107470	14	2	1	0.02
M13 240123	4	2	1	0.02
2891	390	20	1	0.02
W-7866	16	1073	1	0.02
4-00341	101	237	1	0.02
LNP27432	14	2	1	0.02
M29350	1	5	1	0.02
M52687	16	21	1	0.02
M19 240303	14	2	1	0.02
NZ18MI0063	13	17	1	0.02
M19 240548	4	2	1	0.02
TRI-320	16	21	1	0.02
M19 240710	4	2	1	0.02
22549	16	306	1	0.02
2170249	1	220	1	0.02
M51462	89	26	1	0.02
0008/18	321	243	1	0.02
0067/17	1	3	1	0.02
M15 240446	16	21	1	0.02
M14 240018	14	2	1	0.02
M16 240887	4	2	1	0.02
Nmiss3307	4	2	1	0.02
M17 240432	16	21	1	0.02
NML012	15	21	1	0.02
M17 240661	4	24	1	0.02
M13 240175	16	18	1	0.02
2894	16	3	1	0.02
13.6067.H	14	2	1	0.02
LNP28558	101	237	1	0.02
Nm453	16	688	1	0.02
UNI-703	16	21	1	0.02
M14 240428	13	17	1	0.02
M22 240021 VO P2a	4	2	1	0.02
LNP27406	1	17	1	0.02
Nm510	16	910	1	0.02
M26418	4	2	1	0.02
BT39808V3C	16	2	1	0.02
Nm040_Nei437_T1	16	669	1	0.02
22-782	1	3	1	0.02
M18 240238	13	17	1	0.02
51202	4	2	1	0.02
62851	16	21	1	0.02
Nmiss3190	390	8	1	0.02
Nm040_Nei139_T3	16	669	1	0.02
Nm040Nei264T1-3	16	669	1	0.02
Nm040Nei028T1n-1	16	669	1	0.02
M20 240290	16	669	1	0.02
13.5135.Z	16	21	1	0.02
IE19Nm06	13	17	1	0.02
0085/16	37	883	1	0.02
M18 240037	14	17	1	0.02
NLMB082	15	21	1	0.02
M18 240429	13	17	1	0.02
LNP28319	15	21	1	0.02
M19 240118	13	17	1	0.02
M16 240133	16	31	1	0.02
M13 240041	14	668	1	0.02
M15 240425	16	3	1	0.02
LNP27532	13	24	1	0.02
161013	16	21	1	0.02
DE14281	69	20	1	0.02
12051-15	-	-	1	0.02
M14 240564	14	2	1	0.02
23MN0110	69	286	1	0.02
LNP28534	510	29	1	0.02
20-419-MEN	16	21	1	0.02
NZ20MI0043	13	20	1	0.02
M13 240709	765	10	1	0.02
M54367	16	21	1	0.02
2220920	14	24	1	0.02
IPM143	1	3	1	0.02
LNP28450	1045	20	1	0.02
LNP28394	16	20	1	0.02
NML2020-038	4	2	1	0.02
23	16	21	1	0.02
IE13Nm19	4	2	1	0.02
M17 240537	13	17	1	0.02
M13 240097	16	31	1	0.02
Nm461	1028	688	1	0.02
M13 240476	13	677	1	0.02
M20 240121	89	118	1	0.02
M37194	13	114	1	0.02
M16 240737	13	17	1	0.02
M28126	276	2	1	0.02
M14 240315	16	465	1	0.02
M17 240322	16	31	1	0.02
M16 240739	15	21	1	0.02
IE14Nm10	698	17	1	0.02
M13 240004	506	21	1	0.02
Nm384	850	1104	1	0.02
M15 240090	13	17	1	0.02
M13 240063	108	118	1	0.02
M15 240203	101	367	1	0.02
M22 240134	13	17	1	0.02
M14 240011	13	17	1	0.02
MM1892	37	180	1	0.02
0066/20	14	2	1	0.02
BT39973V3C	16	115	1	0.02
M53541	16	21	1	0.02
M19 240339	4	2	1	0.02
M21 240225	13	17	1	0.02
M16 240156	4	2	1	0.02
M37474	14	2	1	0.02
NZ21MI0038	13	20	1	0.02
M27482	4	2	1	0.02
M22 240116	321	243	1	0.02
M16 240647	110	-	1	0.02
TRI-15	16	21	1	0.02
CHB094	1207	17	1	0.02
M13.1	4	607	1	0.02
M40322	16	21	1	0.02
NML2019-105	16	122	1	0.02
DE14502	14	2	1	0.02
M38916	16	669	1	0.02
2190135	16	129	1	0.02
LNP27336	16	21	1	0.02
NZ22MI0028	4	2	1	0.02
LNP27353	510	29	1	0.02
NML2018-063	13	21	1	0.02
M19 240180	102	17	1	0.02
M19 240263	4	2	1	0.02
LNP27274	13	24	1	0.02
IPM28	1	3	1	0.02
M17 240069	14	2	1	0.02
M41483	1	5	1	0.02
M14 240025	13	17	1	0.02
M13 240263	4	2	1	0.02
M15 240541	13	17	1	0.02
M44733	16	53	1	0.02
M17 240102	13	17	1	0.02
M16 240711	86	2	1	0.02
Nm423	16	910	1	0.02
13.6117.K	13	114	1	0.02
M20 240224	456	20	1	0.02
M14 240408	15	21	1	0.02
50617	23	312	1	0.02
M22 240029 ShSp P2a3	16	21	1	0.02
M29089	1	5	1	0.02
Nm040_Nei153_T3	16	669	1	0.02
6940	4	21	1	0.02
M13 240153	13	0	1	0.02
M14 240531	15	21	1	0.02
15-8700522	13	17	1	0.02
M17 240055	15	21	1	0.02
IE14Nm06	4	2	1	0.02
15-360-MEN	16	21	1	0.02
M21 240215 VO P1	16	24	1	0.02
NML2015-028	4	2	1	0.02
M18 240416	4	1175	1	0.02
Nmiss3256	245	24	1	0.02
M18 240398	14	2	1	0.02
M17 240157	4	24	1	0.02
2202130	14	129	1	0.02
M22 240068	4	2	1	0.02
13.4142.L	15	21	1	0.02
NML2017-099	13	114	1	0.02
M25954	608	2	1	0.02
DE14422	69	20	1	0.02
EXNM870	4	2	1	0.02
NML2019-012	509	29	1	0.02
M15 240925	14	471	1	0.02
M15 240757	16	20	1	0.02
NML2018-128	13	17	1	0.02
LNP27675NNl	16	2	1	0.02
21-136-MEN	510	29	1	0.02
16-64	4	2	1	0.02
M17 240033	15	21	1	0.02
M13 240623	4	29	1	0.02
15-8700108	18	945	1	0.02
Nm476	578	688	1	0.02
M18 240257	13	17	1	0.02
M15 240373	13	17	1	0.02
M46298	16	816	1	0.02
M14 240077	1	29	1	0.02
M16 240443	13	17	1	0.02
C20289	13	114	1	0.02
Nm040_Nei018_T3	16	669	1	0.02
M21 240184 ShSp P2a3	4	2	1	0.02
M17 240254	13	17	1	0.02
50	16	21	1	0.02
M43861	16	669	1	0.02
51593	1382	312	1	0.02
BM-1246a	13	24	1	0.02
0007/18	16	21	1	0.02
M15 240701	15	21	1	0.02
M40272	16	234	1	0.02
NML2022-048	13	114	1	0.02
M14 240477	4	2	1	0.02
M15 240273	318	122	1	0.02
BT36772V3C	969	29	1	0.02
NML2022-060	4	2	1	0.02
M17 240080	4	2	1	0.02
NML2021-044	13	25	1	0.02
IE16Nm65	16	20	1	0.02
Nm040Nei1004T1-2	16	669	1	0.02
23MN0114	16	47	1	0.02
DE14583	119	24	1	0.02
Nm040Nei367T1-3	16	669	1	0.02
2180697	510	29	1	0.02
M14 240074	651	2	1	0.02
2180823	510	29	1	0.02
M39083	18	945	1	0.02
M44968	106	19	1	0.02
M22 240023 ShSp P2b	4	2	1	0.02
Nmiss3262	4	2	1	0.02
M19 240262	13	17	1	0.02
M27994	16	21	1	0.02
M18 240129	4	558	1	0.02
M39814	16	3	1	0.02
M21 240199	13	17	1	0.02
2161342	1	220	1	0.02
M19 240156	4	2	1	0.02
M13 240565	15	21	1	0.02
M40973	1	3	1	0.02
DE14716	-	379	1	0.02
LNP27708	94	145	1	0.02
BT37714V3C	16	47	1	0.02
EXNM784	14	214	1	0.02
IPM1	123	2	1	0.02
LNP28441	510	29	1	0.02
M15 240071	13	2	1	0.02
M20 240038	1	3	1	0.02
M19 240518	16	129	1	0.02
NIID571	18	20	1	0.02
120Mo	16	21	1	0.02
M44740	15	21	1	0.02
DE14240	15	21	1	0.02
IE14Nm01	13	17	1	0.02
LNP28264	110	657	1	0.02
M18 240292	4	2	1	0.02
BT18224V3C	16	21	1	0.02
LNP27342	16	47	1	0.02
M41094	16	21	1	0.02
BR41426	16	21	1	0.02
Nm040Nei171T1-2	16	669	1	0.02
M13 240708	14	2	1	0.02
48772	4	2	1	0.02
Nm040Nei264T1-1	16	669	1	0.02
M21 240171 ShSp P1a2	4	2	1	0.02
AK-2069_Str	15	21	1	0.02
Nm380	16	1086	1	0.02
NML007	15	21	1	0.02
0051/18	252	1658	1	0.02
NM2019-105	16	122	1	0.02
Nm040_Nei139_T7	16	669	1	0.02
IPM131	1	3	1	0.02
22387	228	17	1	0.02
2210049	510	29	1	0.02
M15 240168	215	122	1	0.02
H14-RESP-022	16	306	1	0.02
Nmiss3122	-	20	1	0.02
M14 240095	4	2	1	0.02
IPM127	1	3	1	0.02
NML2018-055	4	2	1	0.02
M14 240425	4	2	1	0.02
M15 240443	13	803	1	0.02
M21 240233	13	17	1	0.02
0055/13	16	21	1	0.02
M16 240049	4	-	1	0.02
LNP27392	14	2	1	0.02
33/2013	15	17	1	0.02
M14 240133	13	118	1	0.02
M13 240157	4	2	1	0.02
M41927	510	29	1	0.02
NML2022-018	16	921	1	0.02
M15 240226	16	21	1	0.02
M40966	1	5	1	0.02
NML2017-118	19	6	1	0.02
LNP28578	15	21	1	0.02
2172221	123	2	1	0.02
LNP28915	14	2	1	0.02
0038/16	37	89	1	0.02
NLMB153	19	6	1	0.02
M15 240799	4	558	1	0.02
CA40356	1022	17	1	0.02
DE14724	-	130	1	0.02
M2.1	4	607	1	0.02
NMLB069	19	6	1	0.02
NMLB100	19	1	1	0.02
CA42671	713	24	1	0.02
M15 240003	19	21	1	0.02
NML2017-088	119	24	1	0.02
M13 240197	13	17	1	0.02
M15 240424	15	21	1	0.02
NLMB069	19	6	1	0.02
IE18Nm13	19	20	1	0.02
M17 240510	236	17	1	0.02
M19 240707	4	2	1	0.02
M15 240312	19	2	1	0.02
LNP30352	321	243	1	0.02
M43855	19	2	1	0.02
15-8700655	15	21	1	0.02
DZ12	19	6	1	0.02
M18 240196	685	20	1	0.02
22MN0041	13	114	1	0.02
TRI-103	19	29	1	0.02
M18 240397	19	6	1	0.02
15/2013	13	17	1	0.02
M17 240414	13	17	1	0.02
W-5358	1	3	1	0.02
22218	283	2	1	0.02
107477	14	2	1	0.02
M41029	19	2	1	0.02
22445	119	101	1	0.02
NML2016-153	19	6	1	0.02
M37963	19	-	1	0.02
M18 240401	13	17	1	0.02
M17 240067	13	17	1	0.02
344	37	180	1	0.02
M13 240488	29	3	1	0.02
21-30-MEN	19	6	1	0.02
NML2022-059	13	17	1	0.02
0076/16	1	3	1	0.02
LNP27383	15	21	1	0.02
NIID658	19	1049	1	0.02
M41836	1	5	1	0.02
IPM9	1	3	1	0.02
NZ22MI0044	13	20	1	0.02
GL40886	19	21	1	0.02
107496	14	2	1	0.02
DE14439	19	2	1	0.02
M14 240520	61	17	1	0.02
M19 240704	14	2	1	0.02
Nm486	578	688	1	0.02
M15 240877	4	2	1	0.02
M22 240064	19	9	1	0.02
NLMB019	506	21	1	0.02
2678	390	20	1	0.02
H15-RESP-007	19	9	1	0.02
23MN0039	4	2	1	0.02
157M	4	111	1	0.02
M37057	15	21	1	0.02
M28991	276	8	1	0.02
M29116	19	2	1	0.02
M20 240142	4	2	1	0.02
M15 240789	13	114	1	0.02
P95	13	145	1	0.02
IE18Nm23	1	187	1	0.02
M20 240171	1362	2	1	0.02
14-8707662	13	17	1	0.02
NLMB160	13	17	1	0.02
UNI-143	19	9	1	0.02
M17 240412	-	2	1	0.02
M13 240502	1	20	1	0.02
M19 240103	906	21	1	0.02
M13 240534	830	118	1	0.02
TRI-294	19	9	1	0.02
M22 240063	19	9	1	0.02
TRI-324	19	9	1	0.02
M13 240121	13	17	1	0.02
2210009	4	2	1	0.02
NML2023-028	510	29	1	0.02
M13 240608	4	2	1	0.02
CM40924	989	17	1	0.02
M46092	1	5	1	0.02
M13 240748	19	9	1	0.02
53	14	21	1	0.02
M29037	13	17	1	0.02
51709	19	29	1	0.02
TRI-407	19	9	1	0.02
NML2018-172	4	2	1	0.02
18-299	15	-	1	0.02
BT18775V3C	510	29	1	0.02
M15 240325	13	17	1	0.02
DZ10	1079	2	1	0.02
Nm416	404	1088	1	0.02
Nmiss3304	13	20	1	0.02
M20 240316	13	17	1	0.02
M14 240252	13	17	1	0.02
M14 240254	14	2	1	0.02
GL41574	106	21	1	0.02
NML2019-054	89	2	1	0.02
LNP27525	14	2	1	0.02
21405	19	-	1	0.02
2172595	1	220	1	0.02
DE14162	510	29	1	0.02
107490	4	2	1	0.02
IPM17	1	3	1	0.02
M-046-16	19	1203	1	0.02
M17 240317	4	29	1	0.02
BT27745V3C	125	17	1	0.02
LNP28351	15	21	1	0.02
M21 240210	13	17	1	0.02
LNP27403	14	20	1	0.02
M19 240027	19	17	1	0.02
UNI-178	927	-	1	0.02
NZ21MI0009	4	-	1	0.02
M18 240032	1166	17	1	0.02
22655	13	1476	1	0.02
NIID756	18	1660	1	0.02
EF-264	119	24	1	0.02
2180391	19	17	1	0.02
LNP27340	19	17	1	0.02
M13 240718	15	21	1	0.02
M13 240075	19	17	1	0.02
M41196	4	2	1	0.02
AK-1949	14	29	1	0.02
M43200	19	17	1	0.02
M16 240387	90	17	1	0.02
LNP28584	510	29	1	0.02
M21 240191	14	2	1	0.02
Nm469	18	945	1	0.02
CA40476	13	960	1	0.02
M25981	1	5	1	0.02
M14 240466	15	17	1	0.02
24/2014	19	29	1	0.02
M15 240004	19	114	1	0.02
M16 240127	19	2	1	0.02
49793	405	1719	1	0.02
M15 240149	19	17	1	0.02
20-109	4	2	1	0.02
M13 240206	19	674	1	0.02
22676	19	17	1	0.02
IE19Nm10	989	17	1	0.02
2193188	14	2	1	0.02
0103/17	19	17	1	0.02
M14 240641	13	114	1	0.02
BT18136V3C	627	912	1	0.02
2190746	19	17	1	0.02
NML2020-101	19	2	1	0.02
22476	-	17	1	0.02
M17 240619	989	17	1	0.02
M44083	4	2	1	0.02
M39150	19	1	1	0.02
LNP28637	19	192	1	0.02
M20 240262	19	17	1	0.02
IE15Nm05	13	17	1	0.02
M38309	1	5	1	0.02
M20 240176	19	29	1	0.02
GL41239	19	17	1	0.02
M19 240708	14	552	1	0.02
M14 240567	887	2	1	0.02
23MN0041	499	17	1	0.02
LNP27502	19	305	1	0.02
M21 240185 ShSp P2a	1	3	1	0.02
LNP27420	4	2	1	0.02
M17 240629	4	2	1	0.02
M15 240201	4	2	1	0.02
0059/17	102	1298	1	0.02
LEO-3	19	-	1	0.02
AK-1830	19	17	1	0.02
NML2022-058	15	21	1	0.02
M41751	13	29	1	0.02
NM000064	276	20	1	0.02
2180593_I	19	1466	1	0.02
M13 240468	203	20	1	0.02
M21 240136	233	2	1	0.02
M22 240160	4	2	1	0.02
DE14387	15	21	1	0.02
M21 240232 ShSp P2b	527	742	1	0.02
M21 240177 ShSp P1a2	143	21	1	0.02
M13 240171	4	672	1	0.02
M21 240188 ShSp P2a3	106	122	1	0.02
M20 240047	15	17	1	0.02
Nmiss3208	19	2	1	0.02
M14 240507	19	17	1	0.02
M14 240390	13	17	1	0.02
NML2019-141	4	2	1	0.02
M15 240783	13	17	1	0.02
M-023-16	19	29	1	0.02
M16 240211	14	2	1	0.02
M14 240631	4	761	1	0.02
M28983	1	33	1	0.02
NZ22MI0027	13	20	1	0.02
21421	19	-	1	0.02
IE14Nm03	4	2	1	0.02
174M	19	17	1	0.02
M39151	1	5	1	0.02
22099	4	2	1	0.02
M37481	23	5	1	0.02
M14 240369	4	558	1	0.02
2182140_I	19	17	1	0.02
NZ22MI0054	19	2	1	0.02
IE18Nm53	19	17	1	0.02
M18 240316	4	21	1	0.02
M15 240924	19	2	1	0.02
M13 240611	19	17	1	0.02
M15 240333	4	2	1	0.02
M16 240670	979	949	1	0.02
IE19Nm03	19	17	1	0.02
M14 240591	1	3	1	0.02
WG41026	19	17	1	0.02
M13 240422	19	17	1	0.02
BR40013	14	2	1	0.02
M13 240592	13	17	1	0.02
M20 240312	4	2	1	0.02
DE14684	13	114	1	0.02
M52688	19	2	1	0.02
IE13Nm15	19	17	1	0.02
Nmiss3219	510	29	1	0.02
M40287	19	144	1	0.02
3-1796	650	949	1	0.02
2201366	161	17	1	0.02
M28144	106	19	1	0.02
M17 240576	19	2	1	0.02
EXNM643	4	2	1	0.02
IE17Nm52	19	17	1	0.02
DE14389	4	2	1	0.02
2171863	14	129	1	0.02
M17 240047	69	17	1	0.02
M29619	14	24	1	0.02
23MN0060	327	192	1	0.02
M19 240304	13	17	1	0.02
M13 240540	19	17	1	0.02
W-4897	15	21	1	0.02
M32.1	13	17	1	0.02
M16 240367	953	29	1	0.02
M39137	447	20	1	0.02
13.3813.B	19	17	1	0.02
NML2019-024	15	21	1	0.02
M16 240520	13	17	1	0.02
NML2017-150	19	2	1	0.02
N.m081	1	187	1	0.02
M16 240272	19	17	1	0.02
Nmiss2914	19	2	1	0.02
M37335	19	2	1	0.02
M16 240730	4	2	1	0.02
CA44345	13	17	1	0.02
17	37	1488	1	0.02
M14 240503	19	17	1	0.02
M14 240582	19	2	1	0.02
M17 240438	13	17	1	0.02
49877	19	2	1	0.02
PR40299	19	17	1	0.02
LNP28369	19	305	1	0.02
M13 240118	1	3	1	0.02
LNP28347	4	2	1	0.02
0136/17	1	1333	1	0.02
NML2021-060	19	17	1	0.02
NML2021-056	1424	3	1	0.02
M14 240241	19	17	1	0.02
22639	19	17	1	0.02
2862	260	20	1	0.02
M16 240452	14	17	1	0.02
51003	101	1719	1	0.02
M13 240233	19	17	1	0.02
M17 240860	13	17	1	0.02
M19 240486	4	799	1	0.02
M15 240122	15	21	1	0.02
M19 240084	1	3	1	0.02
M41523	19	29	1	0.02
15206183	19	-	1	0.02
12042_2014	19	17	1	0.02
M20 240147	4	2	1	0.02
22MN0081	13	17	1	0.02
NML2017-049	13	17	1	0.02
BM-1247	321	101	1	0.02
CM40716	19	17	1	0.02
1459000524	19	17	1	0.02
M15 240636	19	2	1	0.02
M17 240148	13	17	1	0.02
M14 240061	15	21	1	0.02
M15 240773	15	-	1	0.02
LNP28294	14	2	1	0.02
M19 240173	13	17	1	0.02
M19 240065	520	8	1	0.02
61557	19	312	1	0.02
2201943	19	192	1	0.02
23MN0063	13	17	1	0.02
M21 240179	215	20	1	0.02
LNP28596	1	3	1	0.02
LNP27332	14	173	1	0.02
M16 240502	19	17	1	0.02
2182159	627	1472	1	0.02
M15 240002	13	17	1	0.02
2172560_I	19	17	1	0.02
W-7884	19	2	1	0.02
M13 240640	13	17	1	0.02
Nmiss3352	510	29	1	0.02
M41643	14	2	1	0.02
M18 240598	19	17	1	0.02
BRI005	4	7	1	0.02
2-11037	18	20	1	0.02
BM-1218	1167	20	1	0.02
171027	4	1486	1	0.02
NM000022	19	129	1	0.02
M14 240360	19	118	1	0.02
M17 240718	390	20	1	0.02
2753	322	20	1	0.02
M13 240421	15	21	1	0.02
M17 240007	14	2	1	0.02
M19 240675	19	114	1	0.02
M15 240806	245	12	1	0.02
2200011	19	20	1	0.02
TRI-243	846	794	1	0.02
23MN0034	13	17	1	0.02
DE14125	1	3	1	0.02
16-123	110	657	1	0.02
DE14490	19	17	1	0.02
M19 240377	19	116	1	0.02
M15 240541C	13	17	1	0.02
M15 240961	13	17	1	0.02
M19 240571	13	17	1	0.02
M17 240680	19	17	1	0.02
14-8706586	19	20	1	0.02
M38878	19	144	1	0.02
M17 240314	13	17	1	0.02
M17 240194	4	190	1	0.02
DE14504	19	17	1	0.02
M22 240021 VO P2	4	2	1	0.02
W-4710	1	376	1	0.02
M39129	569	20	1	0.02
LNP27499	19	17	1	0.02
LNP27334	510	-	1	0.02
2171561	13	20	1	0.02
M19 240569	13	17	1	0.02
M13 240466	13	17	1	0.02
M14 240114	4	2	1	0.02
M38521	19	2	1	0.02
CHB058	19	17	1	0.02
M14 240455	4	2	1	0.02
IE18Nm28	4	2	1	0.02
CR50	4	111	1	0.02
NML2020-072	4	2	1	0.02
114754	14	2	1	0.02
M16 240414	4	7	1	0.02
M17 240577	4	2	1	0.02
Nmiss3055	4	2	1	0.02
LNP28424	19	17	1	0.02
M14 240300	19	17	1	0.02
M16 240079	144	20	1	0.02
BT21584V3C	19	29	1	0.02
GL40827	19	21	1	0.02
107523	-	893	1	0.02
22805	369	17	1	0.02
H03-RESP-001	19	17	1	0.02
C20478	13	114	1	0.02
M40880	19	2	1	0.02
H15-EMI-003	1	707	1	0.02
DE13514	14	2	1	0.02
BT21452V3C	19	17	1	0.02
EXNM699	14	2	1	0.02
60228	19	1719	1	0.02
16.8708125	-	29	1	0.02
M17 240853	13	20	1	0.02
M19 240581	1	3	1	0.02
M18 240333	19	17	1	0.02
M17 240512	19	305	1	0.02
M22 240091	510	29	1	0.02
M13 240745	4	-	1	0.02
M22 240107	224	3	1	0.02
M22 240146	510	29	1	0.02
NML2020-073	19	2	1	0.02
M19 240215	1	3	1	0.02
DE14112	502	20	1	0.02
M13 240294	19	17	1	0.02
M19 240217	13	114	1	0.02
22-180-MEN	19	17	1	0.02
CA40117	19	970	1	0.02
M18 240109	4	2	1	0.02
M16 240501	956	945	1	0.02
M13 240147	15	21	1	0.02
NML2020-079	15	21	1	0.02
M13 240239	4	2	1	0.02
2201818-I	89	17	1	0.02
W-6343	4	2	1	0.02
M20 240098	13	114	1	0.02
M18 240143	19	17	1	0.02
LNP27472	510	29	1	0.02
2200553	19	2	1	0.02
NML2019-083	4	2	1	0.02
M19 240300	167	2	1	0.02
15-8700571	13	17	1	0.02
DE14364	110	657	1	0.02
M15 240225	4	2	1	0.02
M13 240014	13	17	1	0.02
LNP28616	-	29	1	0.02
NLMB138	15	21	1	0.02
H12-EMI-011	1010	17	1	0.02
M41874	19	8	1	0.02
M17 240386	14	24	1	0.02
M17 240806	19	29	1	0.02
M27474	4	2	1	0.02
M21 240191 VO P2	14	2	1	0.02
M28555	903	20	1	0.02
CHB096	19	493	1	0.02
M19 240106	19	17	1	0.02
M16 240802	15	21	1	0.02
M15 240235	13	17	1	0.02
IE19Nm40	19	17	1	0.02
LNP28642	510	29	1	0.02
M29021	19	29	1	0.02
W-6264	119	24	1	0.02
LNP27712	1	3	1	0.02
22MN0015	13	17	1	0.02
M15 240903	19	29	1	0.02
CHB093	13	29	1	0.02
2182627	15	21	1	0.02
M42406	19	144	1	0.02
M43840	19	1205	1	0.02
13.1395.T	13	17	1	0.02
M47221	12	222	1	0.02
M22 240139	4	2	1	0.02
PL41541	13	17	1	0.02
M18 240076	4	2	1	0.02
23MN0089	4	2	1	0.02
107551	13	1344	1	0.02
M39193	19	2	1	0.02
M17 240042	19	17	1	0.02
W-5295	1	376	1	0.02
M20 240251	19	17	1	0.02
CR70O	4	2	1	0.02
M18 240266	69	286	1	0.02
M18 240090	19	17	1	0.02
M13 240646	19	17	1	0.02
NZ20MI0035	4	2	1	0.02
BT21387V3C	13	17	1	0.02
M15 240897	13	17	1	0.02
M37394	1	5	1	0.02
M14 240451	19	17	1	0.02
M13 240172	19	17	1	0.02
DE14269	1	3	1	0.02
M37927	1	5	1	0.02
C10775	23	130	1	0.02
NML2018-081	13	17	1	0.02
M13 240248	690	118	1	0.02
M47899	19	2	1	0.02
M13 240483	19	17	1	0.02
Nmiss3353	119	24	1	0.02
IE13Nm22	19	17	1	0.02
2643	14	-	1	0.02
LNP28674	19	305	1	0.02
M43841	1117	5	1	0.02
15-8700842	19	17	1	0.02
LNP28484	1	3	1	0.02
M17 240441	15	21	1	0.02
M22 240023 VO P2a	4	2	1	0.02
M13 240434	13	25	1	0.02
NML047	15	21	1	0.02
M20 240215	19	17	1	0.02
M21 240226	13	17	1	0.02
DE13312	14	2	1	0.02
M16 240503	19	17	1	0.02
BT40026V3C	19	17	1	0.02
M18 240027	19	17	1	0.02
M15 240437	13	17	1	0.02
M17 240443	19	17	1	0.02
0075/15	1	3	1	0.02
M37953	1	5	1	0.02
15-8701871	19	17	1	0.02
IE16Nm02	19	1262	1	0.02
M18 240052	19	17	1	0.02
M14 240396	19	2	1	0.02
M53539	4	2	1	0.02
M15 240468	13	17	1	0.02
LNP28647	19	17	1	0.02
LNP28433	19	17	1	0.02
M19 240379	19	17	1	0.02
0075/16	19	2	1	0.02
M15 240476	13	17	1	0.02
M16 240169	13	17	1	0.02
K-47_Str	4	2	1	0.02
13.3867.V	13	17	1	0.02
M28995	1	5	1	0.02
2181075	19	17	1	0.02
2210799	19	17	1	0.02
25784	-	24	1	0.02
M13 240150	19	17	1	0.02
M15 240056	19	17	1	0.02
DE14212	4	2	1	0.02
M14 240429	4	2	1	0.02
M16 240751	13	17	1	0.02
M14 240623	1	3	1	0.02
M16 240162	4	2	1	0.02
PR40701	13	17	1	0.02
M19 240504	4	2	1	0.02
M52271	19	1	1	0.02
M16 240019	13	17	1	0.02
M17 240771	1059	24	1	0.02
M14 240046	4	2	1	0.02
13.2342.Z	13	17	1	0.02
M15 240934	15	21	1	0.02
NML2018-047	13	17	1	0.02
M40814	1	5	1	0.02
M20 240103	4	2	1	0.02
LNP28651	235	20	1	0.02
Nm468	419	1059	1	0.02
M39776	1	5	1	0.02
M13 240289	200	255	1	0.02
M39141	1	5	1	0.02
Nmiss3359	390	20	1	0.02
IE13Nm05	4	607	1	0.02
M18 240075	13	17	1	0.02
M15 240297	327	17	1	0.02
DE14606	19	17	1	0.02
C10478	13	114	1	0.02
H08-EMI-013	1328	17	1	0.02
DE14360	13	20	1	0.02
M38692	1	5	1	0.02
2182404_I	510	29	1	0.02
M14 240206	13	17	1	0.02
M20 240134	14	2	1	0.02
2190100	1	220	1	0.02
LNP28569	1	3	1	0.02
15-8709664	19	17	1	0.02
M18 240441	4	2	1	0.02
M18 240126	4	2	1	0.02
16-334-MEN	19	2	1	0.02
22481	1285	26	1	0.02
M18 240308	4	2	1	0.02
107508	14	21	1	0.02
Nmiss3062	4	2	1	0.02
LNP27573	19	130	1	0.02
M17 240377	4	2	1	0.02
M19 240483	1177	3	1	0.02
M39813	1	5	1	0.02
M14 240134	826	26	1	0.02
M13 240224	13	17	1	0.02
CA44204	13	17	1	0.02
IE18Nm37	19	17	1	0.02
SMG-23-2175	-	-	1	0.02
M15 240895	19	17	1	0.02
M27483	276	2	1	0.02
M14 240267	4	2	1	0.02
M14 240083	316	-	1	0.02
M16 240793	13	17	1	0.02
M13 240191	19	17	1	0.02
Nmiss3161	-	1179	1	0.02
M19 240269	143	21	1	0.02
LNP27560	19	17	1	0.02
M18 240423	13	17	1	0.02
M46084	339	192	1	0.02
13.5226.K	19	17	1	0.02
M16 240432	4	2	1	0.02
M13 240074	187	118	1	0.02
M13 240046	19	17	1	0.02
M29207	19	29	1	0.02
M19 240514	4	2	1	0.02
23MN0028	19	-	1	0.02
22MN0070	13	24	1	0.02
LNP28350	19	17	1	0.02
NML2019-169	4	2	1	0.02
M40232	1	5	1	0.02
M13 240164	15	21	1	0.02
NML203b	15	21	1	0.02
NML2018-093	13	17	1	0.02
H08-EMI-007	19	17	1	0.02
M39148	19	17	1	0.02
M21 240183 VO P2a	13	20	1	0.02
2171761	19	17	1	0.02
M13 240638	19	17	1	0.02
IPM132	1	3	1	0.02
M42397	13	114	1	0.02
M14 240309	14	753	1	0.02
14.8703916	1056	17	1	0.02
M19 240301	87	24	1	0.02
NMFJ201901	420	503	1	0.02
M20 240294	1163	3	1	0.02
30910	19	-	1	0.02
DE14137	510	266	1	0.02
M13 240192	19	17	1	0.02
IPM5	123	2	1	0.02
M15 240727	4	865	1	0.02
M21 240188 VO P2	106	122	1	0.02
M21 240232 VO P2a	527	742	1	0.02
DE13996	15	21	1	0.02
M13 240045	13	118	1	0.02
M22 240024	4	2	1	0.02
M13 240478	13	17	1	0.02
M39856	19	20	1	0.02
Nmiss3164	19	1223	1	0.02
M18 240198	13	17	1	0.02
DE14365	19	1052	1	0.02
LNP28639	19	305	1	0.02
SMG-23-1859	18	1511	1	0.02
SMG-19-1077	260	17	1	0.02
M17 240130	19	17	1	0.02
47986	19	312	1	0.02
BT37199V3C	969	29	1	0.02
50277	405	1719	1	0.02
M13 240463	13	17	1	0.02
Nmiss3155	390	20	1	0.02
IE18Nm41	-	2	1	0.02
M16 240056	14	17	1	0.02
M15 240084	13	17	1	0.02
M29033	19	17	1	0.02
M22 240113	510	29	1	0.02
UNI-104	13	833	1	0.02
2181508_1	19	17	1	0.02
M16 240493	260	17	1	0.02
M13 240658	13	17	1	0.02
53834	110	798	1	0.02
LNP27561	19	2	1	0.02
NML2013-026	4	2	1	0.02
DE14500	14	2	1	0.02
IPM27	1	3	1	0.02
107527	14	2	1	0.02
C20389	510	29	1	0.02
M20 240113	4	2	1	0.02
DE14396	19	20	1	0.02
LNP28685	19	17	1	0.02
M17 240421	4	2	1	0.02
M38770	19	1	1	0.02
NIID596	19	1049	1	0.02
LNP27293	510	29	1	0.02
Nmiss3289	19	17	1	0.02
13.6756.W	19	29	1	0.02
M16 240057	14	17	1	0.02
M15 240793	19	2	1	0.02
DE14568	15	21	1	0.02
NIID773	19	1049	1	0.02
DE14203	1207	17	1	0.02
M39537	19	20	1	0.02
2182731	14	2	1	0.02
51141	405	1719	1	0.02
M15 240179	15	21	1	0.02
M18 240342	510	29	1	0.02
M15 240770	510	29	1	0.02
11736	456	118	1	0.02
M21 240171	4	2	1	0.02
LNP28694	119	24	1	0.02
M29620	99	26	1	0.02
2161796_I	1	-	1	0.02
M14 240344	19	17	1	0.02
2724	1130	2	1	0.02
22183	19	17	1	0.02
LNP28376	19	17	1	0.02
M20.1	19	17	1	0.02
23MN0014	13	17	1	0.02
M16 240735	13	25	1	0.02
M19 240385	1059	24	1	0.02
M28962	110	3	1	0.02
M40200	1	5	1	0.02
22MN0010	4	558	1	0.02
M16.1	13	17	1	0.02
M17 240847	1	3	1	0.02
M13 240486	15	21	1	0.02
M17 240041	144	29	1	0.02
IE13Nm44	4	2	1	0.02
IE13Nm09	15	21	1	0.02
101M	101	-	1	0.02
LNP27642	19	1187	1	0.02
117Mo	4	111	1	0.02
PR40009	19	17	1	0.02
M13 240012	4	2	1	0.02
DE14695	323	115	1	0.02
NML2019-030	1298	2	1	0.02
M17 240389	4	2	1	0.02
NML2021-002	19	21	1	0.02
2220138	510	29	1	0.02
IE16Nm55	13	17	1	0.02
M52912	19	2	1	0.02
M29120	1	765	1	0.02
M13 240135	9	2	1	0.02
M13 240481	364	29	1	0.02
M18 240156	19	17	1	0.02
M15 240868	4	58	1	0.02
IE18Nm07	4	306	1	0.02
M18 240165	13	17	1	0.02
M16 240635	19	17	1	0.02
DE14349	15	21	1	0.02
CHB068	1	3	1	0.02
GL41113	19	17	1	0.02
M29682	144	20	1	0.02
M15 240986	4	-	1	0.02
2619	13	17	1	0.02
14-8704161	19	17	1	0.02
IE13Nm32	4	-	1	0.02
DE14730	19	17	1	0.02
SMG-19-1068	260	17	1	0.02
M14 240619	19	17	1	0.02
LNP28513	119	24	1	0.02
NML2020-066	4	2	1	0.02
M16 240288	4	7	1	0.02
M29079	19	29	1	0.02
C10526	144	20	1	0.02
64261	19	312	1	0.02
H15-RESP-006	19	17	1	0.02
22MN0039	19	29	1	0.02
M19 240353	4	2	1	0.02
M19 240090	13	17	1	0.02
NML2018-042	509	29	1	0.02
M21 240183 VO P2	13	20	1	0.02
M41629	19	17	1	0.02
LNP27634	4	2	1	0.02
M14 240099	19	17	1	0.02
LNP28404	19	130	1	0.02
M14 240382	19	17	1	0.02
2182118	1245	17	1	0.02
M17 240420	19	2	1	0.02
2201792	89	17	1	0.02
DE14401	510	29	1	0.02
M17 240316	499	2	1	0.02
2876	19	2	1	0.02
M19 240162	4	2	1	0.02
NZ22MI0019	13	20	1	0.02
M15 240259	2	21	1	0.02
2210403	14	2	1	0.02
M20 240323	1059	24	1	0.02
M43842	19	20	1	0.02
M21 240183 ShSp P2a3	13	20	1	0.02
M29073	13	17	1	0.02
W-7532	110	2	1	0.02
M40029	4	2	1	0.02
NIID799	18	1660	1	0.02
LNP28688	19	17	1	0.02
30273	650	949	1	0.02
M21 240181 ShSp P1a2	13	24	1	0.02
CA41689	13	17	1	0.02
M15 240286	13	17	1	0.02
M22 240004	13	17	1	0.02
2200584	1	3	1	0.02
M22 240008	13	17	1	0.02
M18 240193	19	17	1	0.02
M27475	1	5	1	0.02
M44521	4	2	1	0.02
NMLB036	19	2	1	0.02
M13 240495	4	2	1	0.02
M16 240495	19	17	1	0.02
M22 240021 ShSp P2a	4	2	1	0.02
M17 240178	13	17	1	0.02
M21 240235 VO P2a	4	2	1	0.02
23MN0017	1	557	1	0.02
H09-EMI-008	1354	17	1	0.02
13.1682.M	13	17	1	0.02
61254	806	21	1	0.02
M17 240310	4	1175	1	0.02
M13 240213	13	17	1	0.02
M14 240266	19	17	1	0.02
1459000173	108	-	1	0.02
2200297	19	17	1	0.02
M15 240058	13	17	1	0.02
NML2023-012	19	21	1	0.02
22MN0032	13	17	1	0.02
M44064	1	5	1	0.02
2220412	510	29	1	0.02
M52553	13	114	1	0.02
M14 240319	19	17	1	0.02
M13 240048	13	17	1	0.02
M17 240754	4	943	1	0.02
M15 240074	4	2	1	0.02
LNP27507	1	3	1	0.02
M37980	119	24	1	0.02
OX41014	19	900	1	0.02
LNP27656	19	305	1	0.02
M40212	1	5	1	0.02
3-50861	220	-	1	0.02
M16 240159	13	17	1	0.02
NML2018-169	509	29	1	0.02
Nmiss3179	260	20	1	0.02
M16 240369	19	942	1	0.02
CA40177	19	21	1	0.02
H03-EMI-003	19	17	1	0.02
2171956	510	29	1	0.02
M15 240724	19	1	1	0.02
2180380	544	669	1	0.02
PL41851	19	10	1	0.02
M39217	19	20	1	0.02
NML2017-144	19	2	1	0.02
NIID643	18	1660	1	0.02
M20 240327	291	492	1	0.02
LNP28666	144	20	1	0.02
M13 240397	291	21	1	0.02
W-5818	1	376	1	0.02
M21 240232 ShSp P1a2	527	742	1	0.02
SMG-21-1837	19	34	1	0.02
IE14Nm05	4	2	1	0.02
M38525	13	114	1	0.02
IE13Nm37	19	17	1	0.02
LNP27647	119	24	1	0.02
M16 240509	19	17	1	0.02
23MN0013	510	29	1	0.02
M13 240562	19	17	1	0.02
LNP28271	15	21	1	0.02
110Mo	15	21	1	0.02
M16 240438	15	21	1	0.02
M17 240846	1	3	1	0.02
IE17Nm08	1100	21	1	0.02
M21 240181	13	24	1	0.02
M13 240450	13	17	1	0.02
LNP27506	134	24	1	0.02
NML2018-060	4	2	1	0.02
M19 240226	19	329	1	0.02
M41530	100	1	1	0.02
Nm505	1228	688	1	0.02
M13 240256	19	17	1	0.02
22MN0079	4	2	1	0.02
M20 240093	1	3	1	0.02
M14 240123	13	-	1	0.02
W-5371	536	21	1	0.02
NZ20MI0033	14	2	1	0.02
0082/15	19	2	1	0.02
2180799	316	115	1	0.02
2822	390	20	1	0.02
M17 240370	19	17	1	0.02
DE14306	14	2	1	0.02
NIID584	18	20	1	0.02
0022/17	1	3	1	0.02
DE14428	19	2	1	0.02
0049/17	15	870	1	0.02
M53542	19	1205	1	0.02
M21 240184 ShSp P2b	4	2	1	0.02
158M	510	29	1	0.02
M14 240149	13	-	1	0.02
CHB073	4	1589	1	0.02
IPM147	144	20	1	0.02
M27493	435	21	1	0.02
M13 240455	19	17	1	0.02
M17 240457	4	2	1	0.02
PR40108	19	17	1	0.02
114744	4	634	1	0.02
NZ20MI0004	4	2	1	0.02
M14 240295	13	114	1	0.02
M21 240202	1	3	1	0.02
M25940	19	21	1	0.02
2182531_II	4	2	1	0.02
M16 240113	15	21	1	0.02
M13 240548	19	145	1	0.02
M18 240040	4	2	1	0.02
M17 240143	19	17	1	0.02
M35.1	4	607	1	0.02
M38597	19	17	1	0.02
M13 240181	4	2	1	0.02
M15 240991	160	24	1	0.02
137M	4	2	1	0.02
M13 240272	705	20	1	0.02
107468	14	2	1	0.02
NLMB007	13	17	1	0.02
P79	19	2	1	0.02
CHB076	197	114	1	0.02
M13 240019	702	2	1	0.02
M14 240596	19	17	1	0.02
2192941	14	2	1	0.02
M21 240185 ShSp P2b	1	3	1	0.02
IE19Nm18	4	2	1	0.02
M17 240453	19	17	1	0.02
BT37246V3C	4	2	1	0.02
M15 240886	13	17	1	0.02
GL41107	19	17	1	0.02
M29022	19	29	1	0.02
LNP28452	14	2	1	0.02
BT37689V3C	13	17	1	0.02
NIID705	18	1660	1	0.02
M27801	1	5	1	0.02
M17 240664	19	17	1	0.02
51310	19	312	1	0.02
M21 240003	15	21	1	0.02
M15 240121	141	801	1	0.02
M22 240060	13	17	1	0.02
2764	110	21	1	0.02
IE17Nm27	4	1486	1	0.02
NML2019-101	13	17	1	0.02
2220881I	510	29	1	0.02
M41487	19	2	1	0.02
M47444	19	262	1	0.02
NML2023-038	4	2	1	0.02
M13 240000	19	17	1	0.02
M18 240181	19	18	1	0.02
IPM118	1	3	1	0.02
OX41162	19	900	1	0.02
15-8701782	15	21	1	0.02
M14 240073	15	17	1	0.02
M29071	1	5	1	0.02
M21 240188	106	122	1	0.02
NML2021-043	13	17	1	0.02
63352	23	1726	1	0.02
IE14Nm08	19	2	1	0.02
62007	4	2	1	0.02
M21 240043	13	17	1	0.02
M28964	1	5	1	0.02
M21 240224	4	2	1	0.02
55141	13	1720	1	0.02
2191325	510	29	1	0.02
DE14446	14	2	1	0.02
M14 240542	15	21	1	0.02
M52854	260	-	1	0.02
LNP27654	1	3	1	0.02
0042/15	19	2	1	0.02
IE13Nm16	15	21	1	0.02
M36680	1	5	1	0.02
2170129_I	1	220	1	0.02
M47895	19	2	1	0.02
M14 240557	4	2	1	0.02
M16 240661	1	3	1	0.02
M1.1	4	607	1	0.02
DE14547	125	2	1	0.02
M28409	106	819	1	0.02
M19 240159	510	29	1	0.02
C10763	23	130	1	0.02
DE13280	15	21	1	0.02
M18 240454	4	2	1	0.02
M21 240235 VO P1	4	2	1	0.02
PR40805	13	17	1	0.02
1459000413	19	29	1	0.02
M41107	19	2	1	0.02
UNI-582	106	-	1	0.02
M19 240558	13	17	1	0.02
15-8708141	14	573	1	0.02
NML2018-144	15	21	1	0.02
144M	110	21	1	0.02
CHB085	13	17	1	0.02
OX40627	13	904	1	0.02
2172575_I	15	21	1	0.02
M15 240206	19	18	1	0.02
NMFJ202202	18	20	1	0.02
M51571	1	3	1	0.02
M44967	19	2	1	0.02
M46083	1	5	1	0.02
M21 240195	13	21	1	0.02
M18 240358	13	17	1	0.02
H09-EMI-007	13	130	1	0.02
M52674	1	5	1	0.02
M20 240240	19	2	1	0.02
0048/18	19	18	1	0.02
22MN0063	19	-	1	0.02
TRI-12	19	792	1	0.02
M21 240183	13	20	1	0.02
22MN0011	4	869	1	0.02
M18 240093	13	117	1	0.02
M16 240507	4	-	1	0.02
M15 240109	15	21	1	0.02
WG40060	19	2	1	0.02
DE14726	19	24	1	0.02
M51579	1244	2	1	0.02
M17 240212	4	2	1	0.02
NML2023-036	510	29	1	0.02
M16 240091	13	17	1	0.02
M13 240490	13	17	1	0.02
M15 240182	15	21	1	0.02
DE14646	-	2	1	0.02
M13 240697	453	20	1	0.02
M44054	19	1049	1	0.02
M39085	904	21	1	0.02
NIID794	19	1049	1	0.02
PL40347	19	312	1	0.02
M17 240669	4	2	1	0.02
CA40656	14	2	1	0.02
M18 240192	4	1381	1	0.02
M15 240541D	13	17	1	0.02
IE20Nm18	19	2	1	0.02
M38666	19	2	1	0.02
NML2022-112	19	3	1	0.02
IPM140	-	24	1	0.02
17-406	19	21	1	0.02
M18 240643	13	17	1	0.02
M29024	19	20	1	0.02
M21 240149	13	17	1	0.02
M16 240720	14	2	1	0.02
M16 240410	13	-	1	0.02
14-8705223	13	17	1	0.02
15-8704692	13	117	1	0.02
56331	4	2	1	0.02
22289	15	21	1	0.02
M29115	1	5	1	0.02
M13 240519	19	18	1	0.02
M22 240023 VO P1	4	2	1	0.02
M21 240176	4	2	1	0.02
NIID795	19	1049	1	0.02
GL41886	19	2	1	0.02
M18 240073	69	20	1	0.02
NML2019-022	15	21	1	0.02
DE14343	14	29	1	0.02
M15 240801	147	13	1	0.02
M15 240920	110	-	1	0.02
NML2019-138	90	20	1	0.02
M28996	1	5	1	0.02
M38053	1	5	1	0.02
M19 240415	19	1707	1	0.02
M17 240451	4	2	1	0.02
0042/20	119	24	1	0.02
H08-EMI-002	275	118	1	0.02
M38623	1	3	1	0.02
M16 240007	4	2	1	0.02
DE14368	19	10	1	0.02
OX41184	19	900	1	0.02
M18 240065	4	2	1	0.02
M15 240208	13	17	1	0.02
BT39617V3C	19	2	1	0.02
M13 240257	19	197	1	0.02
M28921	19	2	1	0.02
BT21686V3C	1166	17	1	0.02
23-61	321	243	1	0.02
M14 240177	13	17	1	0.02
LNP27662	4	2	1	0.02
55135	4	2	1	0.02
M15 240719	1	3	1	0.02
7	15	20	1	0.02
IPM110	160	2	1	0.02
23MN0055	4	558	1	0.02
M16 240540	13	17	1	0.02
M39523	1	863	1	0.02
IPM150	1	3	1	0.02
M46103	19	20	1	0.02
M21 240177 VO P1	143	21	1	0.02
TRI-655	19	795	1	0.02
M21 240179 VO P2	215	20	1	0.02
M19 240365	15	21	1	0.02
NZ21MI0015	13	20	1	0.02
M18 240434	13	17	1	0.02
W-5302	138	21	1	0.02
M13 240235	4	2	1	0.02
22MN0009	13	17	1	0.02
DE14521	15	21	1	0.02
[truncated: 3,677 more rows]

## Sheet: None NHBA
fHbp_peptide	NHBA_peptide	none fHbp	ex_m fHbp
37	6	245	44
106	6	289
1380	6	9
19	6	0
19	6	18
19	6	3
1335	6	27
37	6	4
90	6	7
-	6	6
16	6	608
37	6
19	6
252	6
37	6
37	6
37	6
37	6
37	6
184	6
252	6
37	6
25	6
19	6
-	6
-	6
106	6
13	6
19	6
24	6
90	6
37	6
106	6
37	6
37	6
34	6
37	6
19	6
890	6
37	6
37	6
37	6
37	6
37	6
13	6
1144	6
37	6
200	6
37	6
125	6
125	6
19	6
37	6
106	6
37	6
37	6
37	6
344	6
-	6
37	6
19	9
19	9
1	9
13	9
13	9
1168	9
19	9
19	9
286	9
5	9
5	9
14	9
24	9
5	9
4	9
19	9
19	9
15	9
24	9
19	9
24	9
24	9
19	9
13	17
13	17
13	17
13	17
19	17
202	17
13	17
13	17
19	17
13	17
19	17
13	17
13	17
87	17
13	17
13	17
19	17
13	17
727	17
19	17
13	17
13	17
45	17
110	17
19	17
13	17
13	17
19	17
327	17
15	17
13	17
19	17
1	17
13	17
13	17
19	17
13	17
19	17
13	17
19	17
824	17
1423	17
94	17
13	17
13	17
13	17
13	17
13	17
19	17
13	17
13	17
89	17
19	17
13	17
13	17
13	17
13	17
13	17
228	17
1	17
19	17
13	17
13	17
13	17
13	17
19	17
13	17
13	17
-	17
13	17
19	17
14	17
13	17
13	17
14	17
170	17
19	17
19	17
19	17
13	17
13	17
19	17
13	17
13	17
13	17
1	17
19	17
13	17
30	17
13	17
61	17
19	17
19	17
19	17
13	17
13	17
19	17
19	17
13	17
19	17
13	17
13	17
13	17
19	17
19	17
19	17
19	17
13	17
1	17
13	17
13	17
14	17
13	17
13	17
19	17
19	17
19	17
13	17
13	17
698	17
13	17
13	17
13	17
19	17
19	17
13	17
1207	17
19	17
102	17
13	17
13	17
13	17
19	17
13	17
19	17
13	17
13	17
13	17
19	17
13	17
19	17
13	17
19	17
13	17
19	17
19	17
13	17
13	17
19	17
228	17
13	17
19	17
15	17
19	17
1022	17
13	17
236	17
19	17
13	17
13	17
13	17
13	17
13	17
61	17
31	17
13	17
13	17
19	17
13	17
989	17
19	17
13	17
13	17
13	17
13	17
125	17
13	17
1166	17
19	17
19	17
90	17
15	17
989	17
19	17
-	17
989	17
19	17
13	17
19	17
499	17
19	17
19	17
15	17
13	17
13	17
19	17
19	17
19	17
19	17
13	17
19	17
19	17
161	17
19	17
69	17
13	17
19	17
13	17
19	17
13	17
19	17
13	17
13	17
25	17
19	17
14	17
13	17
19	17
13	17
13	17
13	17
13	17
19	17
19	17
13	17
13	17
19	17
13	17
19	17
19	17
13	17
13	17
13	17
13	17
19	17
13	17
19	17
13	17
13	17
19	17
19	17
19	17
369	17
19	17
19	17
19	17
19	17
89	17
19	17
13	17
13	17
1010	17
19	17
13	17
13	17
31	17
19	17
19	17
13	17
13	17
19	17
13	17
13	17
19	17
13	17
13	17
13	17
13	17
19	17
13	17
13	17
13	17
19	17
19	17
13	17
13	17
13	17
13	17
13	17
13	17
327	17
1328	17
13	17
13	17
13	17
13	17
13	17
19	17
13	17
19	17
1056	17
13	17
13	17
260	17
19	17
13	17
14	17
13	17
260	17
13	17
19	17
19	17
14	17
1207	17
19	17
19	17
13	17
13	17
13	17
13	17
13	17
260	17
19	17
19	17
19	17
13	17
19	17
19	17
1245	17
89	17
19	17
13	17
13	17
13	17
13	17
13	17
19	17
13	17
1354	17
13	17
13	17
13	17
13	17
13	17
19	17
13	17
19	17
19	17
13	17
19	17
19	17
19	17
13	17
19	17
19	17
13	17
13	17
19	17
13	17
13	17
15	17
13	17
13	17
13	17
19	17
13	17
13	17
31	17
13	17
13	17
13	17
13	17
13	17
19	17
13	17
13	17
24	17
19	17
19	17
19	17
13	17
19	17
1166	17
13	17
13	17
13	17
13	17
19	17
13	17
13	17
13	17
13	17
19	17
13	17
13	17
13	17
13	17
14	17
13	17
13	17
13	17
19	17
19	17
4	17
13	17
13	17
13	17
19	17
174	17
19	17
13	17
19	17
13	17
13	17
954	17
13	17
13	17
19	17
13	17
15	17
13	17
24	17
13	17
13	17
170	17
13	17
260	17
61	17
19	17
13	17
45	18
1	18
45	18
603	18
59	18
45	18
45	18
297	18
13	18
19	18
45	18
1313	18
45	18
45	18
45	18
45	18
225	18
45	18
45	18
45	18
45	18
45	18
45	18
45	18
45	18
45	18
22	18
483	18
45	18
45	18
45	18
45	18
85	18
45	18
45	18
24	18
191	18
628	18
45	18
45	18
45	18
170	18
45	18
45	18
45	18
680	18
45	18
13	18
45	18
45	18
187	18
45	18
2	18
1383	18
885	18
45	18
45	18
45	18
45	18
45	18
45	18
45	18
45	18
19	18
45	18
45	18
59	18
45	18
-	18
1082	18
185	18
45	18
45	18
45	18
45	18
4	18
226	18
45	18
45	18
19	18
45	18
45	18
187	18
45	18
45	18
45	18
499	18
13	18
45	18
45	18
45	18
245	18
31	18
45	18
45	18
45	18
4	18
45	18
45	18
45	18
45	18
297	18
45	18
45	18
297	18
45	18
603	18
13	18
45	18
499	18
13	18
160	18
45	18
-	18
31	18
45	18
45	18
45	18
45	18
45	18
45	18
45	18
45	18
45	18
322	18
85	18
45	18
45	18
45	18
13	18
45	18
45	18
218	18
45	18
215	18
45	18
13	18
45	18
45	18
294	18
19	18
1148	18
45	18
45	18
1355	18
1383	18
45	18
45	18
22	18
45	18
45	18
188	18
45	18
31	18
45	18
45	18
45	18
45	18
45	18
45	18
499	18
763	18
102	18
45	18
763	18
45	18
45	18
45	18
-	18
955	18
10	18
4	18
45	18
1419	18
45	18
45	18
185	18
45	18
31	18
1402	18
294	18
45	18
59	18
45	18
45	18
1404	18
22	18
45	18
1357	18
45	18
558	18
23	18
31	18
4	18
45	18
45	18
715	18
737	18
45	18
13	18
45	18
45	18
45	18
31	18
45	18
650	18
45	18
1413	18
45	18
45	18
366	18
45	18
45	18
45	18
480	18
45	18
45	18
45	18
45	18
45	18
45	18
31	18
13	18
13	18
45	18
45	18
1150	18
45	18
558	18
45	18
19	18
45	18
45	18
45	18
45	18
218	18
45	18
4	18
45	18
45	18
4	18
13	18
45	18
45	18
45	18
82	18
94	18
45	18
45	18
1	18
13	18
45	18
1161	18
187	18
357	18
174	18
-	18
45	18
45	18
31	18
318	18
45	18
45	18
45	18
45	18
45	18
45	18
45	18
45	18
45	18
297	18
45	18
45	18
45	18
45	18
160	18
45	18
45	18
45	18
23	18
45	18
45	18
45	18
125	18
45	18
59	18
13	18
45	18
23	18
45	18
-	18
218	18
45	18
45	18
45	18
13	18
31	18
930	18
85	18
45	18
738	18
30	18
45	18
740	18
45	18
-	18
45	18
483	18
174	18
45	18
45	18
45	18
10	18
45	18
483	18
45	18
1324	18
10	18
45	18
45	18
90	18
45	18
318	18
911	18
31	18
45	18
1248	18
45	18
1115	18
499	18
45	18
45	18
4	18
45	18
4	18
45	18
45	18
45	18
45	18
45	18
45	18
45	18
45	18
45	18
364	18
45	18
45	18
955	18
256	18
686	18
22	18
45	18
45	18
30	18
45	18
45	18
45	18
13	18
45	18
45	18
45	18
45	18
13	18
45	18
45	18
45	18
45	18
16	18
1320	18
31	18
45	18
451	18
110	18
4	18
31	18
45	18
45	18
45	18
45	18
45	18
45	18
45	18
952	18
45	18
226	18
45	18
642	18
13	18
45	18
23	18
100	18
45	18
45	18
483	18
45	18
45	18
45	18
31	18
45	18
483	18
45	18
1361	18
45	18
174	18
364	18
1001	18
13	18
45	18
45	18
45	18
31	18
31	18
814	18
-	18
31	18
185	18
45	18
45	18
45	18
13	18
45	18
430	18
1149	18
4	18
45	18
45	18
45	18
45	18
483	18
45	18
45	18
31	18
45	18
85	18
45	18
45	18
45	18
45	18
45	18
45	18
13	18
45	18
45	18
16	18
4	18
45	18
24	18
15	18
31	18
22	18
102	18
10	18
13	18
13	18
45	18
257	18
45	18
45	18
45	18
-	18
90	18
393	18
45	18
45	18
882	18
45	18
45	18
45	18
45	18
45	18
276	18
45	18
45	18
218	18
45	18
354	18
45	18
45	18
45	18
45	18
-	18
22	18
30	18
14	18
187	18
45	18
45	18
45	18
45	18
45	18
45	18
45	18
45	18
14	30
160	30
14	30
31	30
14	30
14	30
14	30
31	30
14	30
14	30
14	30
14	30
-	30
14	30
14	30
14	30
14	30
14	30
16	31
4	31
4	31
4	31
302	31
14	31
19	31
683	31
302	31
4	31
4	31
14	31
18	31
14	31
4	31
19	31
302	31
19	31
4	31
4	31
4	31
4	31
4	31
4	31
4	31
4	31
16	31
4	31
494	31
4	31
19	31
302	31
302	31
19	31
19	31
4	31
4	31
683	31
302	31
19	31
4	31
16	31
19	31
19	31
4	31
302	31
19	31
683	31
4	31
302	31
19	31
19	31
14	31
14	31
19	31
14	31
14	31
14	31
24	31
4	31
4	31
4	31
4	31
14	31
19	31
4	31
4	31
19	31
302	31
14	31
19	31
302	31
4	31
4	31
4	31
19	31
4	31
302	31
302	31
19	31
4	31
19	31
19	31
4	31
19	43
19	43
435	43
19	43
19	43
69	43
19	43
19	43
435	43
215	43
19	43
19	43
-	43
435	43
435	43
19	43
435	43
19	43
-	43
19	43
19	43
13	43
69	43
19	43
24	43
-	43
19	43
19	43
19	43
435	43
19	43
102	43
435	43
19	43
24	43
19	43
1185	43
180	43
435	43
30	43
19	43
19	43
435	43
-	43
19	43
435	43
19	43
435	43
19	43
19	43
-	43
24	43
19	43
19	43
435	43
19	43
19	43
19	43
19	43
435	43
-	43
19	43
19	43
45	43
460	47
31	47
16	47
21	47
14	47
460	47
19	47
202	47
31	47
84	47
24	47
19	47
19	47
24	47
19	47
19	47
19	47
19	47
19	47
460	47
19	47
19	47
19	47
19	47
19	47
19	47
25	47
16	47
19	47
19	47
19	47
13	47
19	47
19	47
125	47
460	47
30	47
19	47
16	47
21	47
203	47
460	47
84	47
152	47
202	47
19	47
202	47
19	47
19	47
252	47
19	47
460	47
19	47
31	47
21	47
460	47
19	47
460	47
1119	47
19	47
494	47
19	47
31	47
202	47
19	47
19	47
25	47
4	47
19	47
202	47
84	47
13	63
1322; 829	63
19	63
801	63
801	63
296	63
931	63
19	112
510	112
19	112
19	112
15	112
19	112
1367	112
24	112
213	112
19	112
-	112
24	112
19	112
19	112
19	112
24	112
19	112
740	112
1	120
1	120
1	120
1	120
1	120
1	120
1	120
1	120
1	120
1	120
1	120
1	120
1	120
1	120
888	120
1	120
22	120
1	120
1	120
1	120
1	120
1	120
1	120
1	120
1	120
1317	120
1	120
1165	120
1	120
1	120
1	120
1	120
1	120
1	120
1	120
1	120
1	120
1	120
1	120
1	120
1	120

## Sheet: None fHbp
16	21	323
16	950	138
16	20	10
16	669	12
16	669	24
16	669	38
16	21	46
16	669	2
16	21	2
16	910	2
16	24
16	3
16	669
16	669
16	669
16	21
16	669
16	21
16	20
16	669
16	306
16	21
16	119
16	145
16	21
16	21
16	20
16	-
16	669
16	669
16	669
16	3
16	21
16	21
16	129
16	306
16	21
16	10
16	21
16	24
16	21
16	910
16	24
16	21
16	20
16	21
16	21
16	3
16	669
16	910
16	3
16	669
16	29
16	21
16	669
16	802
16	21
16	20
16	910
16	669
16	24
16	21
16	161
16	21
16	24
16	3
16	21
16	129
16	669
16	129
16	21
16	669
16	21
16	24
16	21
16	669
16	119
16	21
16	21
16	669
16	910
16	21
16	697
16	21
16	21
16	21
16	21
16	669
16	1508
16	2
16	669
16	21
16	21
16	21
16	21
16	21
16	21
16	119
16	306
16	669
16	669
16	21
16	1734
16	144
16	21
16	24
16	21
16	669
16	26
16	129
16	306
16	1499
16	306
16	910
16	21
16	2
16	3
16	669
16	21
16	21
16	21
16	21
16	669
16	20
16	21
16	21
16	707
16	21
16	21
16	3
16	20
16	835
16	306
16	669
16	101
16	21
16	465
16	688
16	1716
16	707
16	21
16	21
16	145
16	21
16	20
16	1070
16	24
16	19
16	669
16	910
16	161
16	21
16	669
16	669
16	21
16	21
16	21
16	21
16	24
16	21
16	21
16	24
16	21
16	21
16	20
16	21
16	910
16	1172
16	669
16	669
16	910
16	21
16	18
16	21
16	21
16	910
16	21
16	1073
16	910
16	21
16	1073
16	21
16	21
16	306
16	21
16	21
16	18
16	3
16	688
16	21
16	910
16	2
16	669
16	21
16	669
16	669
16	669
16	669
16	21
16	31
16	3
16	21
16	21
16	21
16	20
16	21
16	31
16	465
16	31
16	115
16	21
16	21
16	21
16	122
16	669
16	129
16	21
16	53
16	910
16	21
16	669
16	21
16	24
16	20
16	2
16	816
16	669
16	21
16	669
16	21
16	234
16	20
16	669
16	47
16	669
16	21
16	3
16	47
16	129
16	21
16	21
16	47
16	21
16	21
16	669
16	669
16	1086
16	122
16	669
16	306
16	21
16	921
16	21
19	6
19	6
19	6
19	1
19	21
19	6
19	20
19	2
19	2
19	6
19	29
19	6
19	2
19	6
19	-
19	6
19	1049
19	21
19	2
19	9
19	9
19	2
19	9
19	9
19	9
19	9
19	9
19	29
19	9
19	-
19	1203
19	17
19	17
19	17
19	17
19	17
19	29
19	114
19	2
19	17
19	674
19	17
19	17
19	17
19	2
19	1
19	192
19	17
19	29
19	17
19	305
19	-
19	17
19	1466
19	2
19	17
19	29
19	-
19	17
19	17
19	2
19	17
19	2
19	17
19	17
19	17
19	17
19	2
19	17
19	144
19	2
19	17
19	17
19	17
19	2
19	17
19	2
19	2
19	17
19	2
19	2
19	17
19	305
19	17
19	17
19	17
19	17
19	29
19	-
19	17
19	17
19	17
19	2
19	312
19	192
19	17
19	17
19	2
19	17
19	129
19	118
19	114
19	20
19	17
19	116
19	17
19	20
19	144
19	17
19	17
19	2
19	17
19	17
19	17
19	29
19	21
19	17
19	2
19	17
19	1719
19	17
19	305
19	2
19	17
19	17
19	970
19	17
19	2
19	8
19	29
19	493
19	17
19	17
19	29
19	29
19	144
19	1205
19	2
19	17
19	17
19	17
19	17
19	17
19	17
19	2
19	17
19	17
19	305
19	17
19	17
19	17
19	17
19	17
19	17
19	17
19	1262
19	17
19	2
19	17
19	17
19	17
19	2
19	17
19	17
19	17
19	17
19	1
19	17
19	17
19	2
19	130
19	17
19	17
19	17
19	17
19	17
19	17
19	29
19	-
19	17
19	17
19	17
19	17
19	17
19	-
19	17
19	20
19	1223
19	1052
19	305
19	17
19	312
19	17
19	17
19	2
19	20
19	17
19	1
19	1049
19	17
19	29
19	2
19	1049
19	20
19	17
19	17
19	17
19	17
19	1187
19	17
19	21
19	2
19	17
19	17
19	17
19	17
19	17
19	17
19	29
19	312
19	17
19	29
19	17
19	17
19	130
19	17
19	2
19	2
19	20
19	17
19	17
19	2
19	17
19	17
19	17
19	21
19	17
19	900
19	305
19	942
19	21
19	17
19	1
19	10
19	20
19	2
19	34
19	17
19	17
19	17
19	329
19	17
19	2
19	17
19	2
19	1205
19	17
19	17
19	21
19	145
19	17
19	17
19	2
19	17
19	17
19	17
19	29
19	17
19	312
19	2
19	262
19	17
19	18
19	900
19	2
19	2
19	2
19	29
19	2
19	18
19	2
19	2
19	18
19	-
19	792
19	2
19	24
19	1049
19	1049
19	312
19	2
19	2
19	3
19	21
19	20
19	18
19	1049
19	2
19	1707
19	10
19	900
19	2
19	197
19	2
19	20
19	795
19	2
19	1049
19	10
19	715
19	29
19	18
19	2
19	2
19	29
19	20
19	145
19	1255
19	2
19	2
19	29
19	-
19	927
19	2
19	29
19	2
19	2
19	29
19	20
19	2
19	29
19	2
19	34
19	2
19	2
19	29
19	2
19	1748
19	312
19	2
19	72
19	523
19	2
19	58
19	2
19	2
19	29
19	8
19	2
19	212
19	513
19	29
19	900
19	220
19	20
19	1
19	20
19	2
19	29
19	116
19	34
19	2
19	255
19	2
19	2
19	793
19	715
19	2
19	2
19	1642
19	116
19	-
19	21
19	2
19	34
19	526
19	31
19	31
19	29
19	286
19	20
19	31
19	251
19	2
19	968
19	312
19	2
19	31
19	312
19	29
19	31
19	31
19	31
19	1721
19	31
19	31
19	31
19	31
19	31
19	312
19	31
19	2
19	2
19	31
19	-
19	1777
19	31
19	31
19	2
19	31
19	-
19	31
19	312
19	31
19	31
19	43
19	43
19	-
19	43
19	43
19	43
19	43
19	43
19	43
19	312
19	43
19	43
19	43
19	43
19	43
19	1
19	43
19	192
19	43
19	43
19	2
19	43
19	2
19	43
19	20
19	513
19	43
19	2
19	43
19	43
19	286
19	759
19	43
19	29
19	2
19	43
19	192
19	43
19	2
19	43
19	43
19	43
19	43
19	43
19	43
19	43
19	43
19	43
19	29
19	47
19	22
19	2
19	262
19	312
19	47
19	2
19	47
19	47
19	47
19	47
19	47
19	47
19	20
19	47
19	47
19	47
19	47
19	47
19	47
19	47
19	47
19	47
19	2
19	47
19	47
19	1049
19	47
19	47
19	47
19	47
19	2
19	2
19	47
19	8
19	47
19	2
19	-
19	47
19	2
19	47
19	114
19	2
19	47
19	-
19	47
19	47
19	312
19	47
19	789
19	63
19	2
19	20
19	112
19	112
19	112
19	112
19	-
19	112
19	289
19	112
19	112
19	112
19	112
19	262
19	1724
19	129
19	312
19	29
19	2
19	2
19	2
19	-
19	312
21	1315
21	20
21	10
21	20
21	20
21	20
21	20
21	20
21	1497
21	1060
21	20
21	20
21	3
21	119
21	1060
21	1498
21	20
21	20
21	20
21	20
21	20
21	0
21	1
21	20
21	20
21	115
21	20
21	2
21	2
21	20
21	706
21	20
21	20
21	20
21	2
21	3
21	20
21	20
21	1060
21	3
21	3
21	20
21	20
21	20
21	20
21	20
21	20
21	20
21	3
21	20
21	20
21	20
21	24
21	20
21	20
21	20
21	20
21	20
21	3
21	20
21	20
21	3
21	20
21	119
21	20
21	129
21	3
21	20
21	20
21	3
21	3
21	1594
21	20
21	3
21	20
21	119
21	20
21	706
21	20
21	20
21	1178
21	20
21	20
21	20
21	1383
21	20
21	20
21	-
21	20
21	20
21	20
21	3
21	20
21	20
21	20
21	20
21	20
21	20
21	21
21	47
21	1170
21	20
21	20
21	3
21	47
21	20
21	20
21	47
21	20
21	20
21	1608
21	20
21	20
22	1385
22	601
22	1266
22	29
22	29
22	20
22	29
22	29
22	29
22	312
22	29
22	29
22	18
22	29
22	18
22	18
22	29
22	18
22	188
22	18
22	29
22	-
22	29
22	18
22	29
22	120
24	2
24	6
24	2
24	951
24	9
24	9
24	9
24	9
24	907
24	10
24	10
24	10
24	21
24	29
24	10
24	10
24	21
24	10
24	3
24	44
24	10
24	1304
24	10
24	10
24	24
24	10
24	10
24	10
24	10
24	10
24	10
24	10
24	29
24	17
24	10
24	10
24	266
24	24
24	312
24	10
24	17
24	10
24	1204
24	10
24	18
24	10
24	10
24	44
24	10
24	10
24	10
24	10
24	10
24	10
24	38
24	305
24	10
24	1469
24	-
24	33
24	337
24	10
24	142
24	10
24	10
24	10
24	10
24	29
24	1204
24	21
24	21
24	313
24	10
24	2
24	10
24	21
24	10
24	10
24	10
24	10
24	10
24	21
24	21
24	2
24	18
24	21
24	630
24	1288
24	1204
24	10
24	31
24	10
24	-
24	21
24	10
24	21
24	43
24	43
24	43
24	2
24	47
24	47
24	1204
24	2
24	10
24	21
24	1645
24	10
24	21
24	112
24	112
24	112
24	10
24	1595
24	21
25	6
25	598
25	13
25	13
25	13
25	24
25	24
25	283
25	138
25	17
25	-
25	130
25	138
25	24
25	10
25	2
25	24
25	24
25	0
25	24
25	130
25	1661
25	130
25	24
25	7
25	114
25	24
25	24
25	24
25	13
25	-
25	138
25	24
25	24
25	24
25	760
25	24
25	24
25	13
25	7
25	24
25	21
25	760
25	54
25	192
25	2
25	24
25	843
25	47
25	138
25	-
25	843
25	47
25	24
25	138
25	24
25	760
30	21
30	17
30	2
30	21
30	29
30	29
30	29
30	18
30	18
30	3
30	18
30	21
30	29
30	43
30	47
30	21
30	114
31	2
31	-
31	897
31	29
31	17
31	21
31	29
31	17
31	1500
31	24
31	22
31	21
31	-
31	16
31	17
31	2
31	3
31	20
31	778
31	18
31	18
31	18
31	1654
31	3
31	18
31	1607
31	20
31	18
31	712
31	16
31	18
31	18
31	29
31	2
31	3
31	18
31	18
31	21
31	18
31	18
31	18
31	2
31	18
31	2
31	19
31	2
31	18
31	18
31	18
31	18
31	18
31	21
31	29
31	29
31	3
31	2
31	20
31	191
31	3
31	192
31	30
31	30
31	2
31	24
31	470
31	3
31	21
31	122
31	47
31	47
31	21
31	47
31	47
31	21
45	-
45	29
45	115
45	115
45	118
45	1681
45	115
45	17
45	29
45	29
45	810
45	676
45	29
45	758
45	29
45	807
45	758
45	29
45	29
45	115
45	29
45	29
45	-
45	29
45	636
45	29
45	-
45	1341
45	900
45	1742
45	-
45	18
45	18
45	18
45	18
45	18
45	18
45	18
45	18
45	18
45	18
45	18
45	18
45	18
45	18
45	18
45	18
45	18
45	18
45	115
45	18
45	18
45	18
45	18
45	115
45	18
45	18
45	18
45	18
45	18
45	18
45	18
45	18
45	18
45	18
45	18
45	18
45	18
45	18
45	18
45	18
45	18
45	18
45	18
45	18
45	18
45	18
45	18
45	18
45	18
45	18
45	18
45	115
45	117
45	18
45	18
45	18
45	18
45	18
45	18
45	18
45	18
45	18
45	18
45	18
45	18
45	18
45	-
45	18
45	18
45	18
45	18
45	18
45	18
45	18
45	18
45	18
45	1590
45	18
45	18
45	18
45	18
45	18
45	18
45	18
45	18
45	18
45	18
45	18
45	18
45	18
45	21
45	18
45	18
45	18
45	18
45	18
45	18
45	18
45	29
45	18
45	18
45	18
45	18
45	18
45	18
45	18
45	18
45	18
45	18
45	18
45	24
45	18
45	18
45	18
45	18
45	18
45	18
45	18
45	18
45	18
45	115
45	18
45	18
45	18
45	18
45	18
45	18
45	18
45	18
45	18
45	18
45	18
45	18
45	18
45	18
45	1342
45	18
45	18
45	18
45	18
45	18
45	18
45	18
45	18
45	18
45	18
45	18
45	18
45	18
45	18
45	18
45	18
45	18
45	18
45	115
45	18
45	18
45	18
45	18
45	18
45	18
45	58
45	18
45	18
45	2
45	18
45	18
45	29
45	18
45	18
45	18
45	18
45	18
45	18
45	18
45	18
45	18
45	18
45	18
45	18
45	18
45	18
45	18
45	18
45	29
45	18
45	18
45	18
45	18
45	18
45	18
45	115
45	18
45	18
45	18
45	1341
45	18
45	18
45	29
45	18
45	18
45	18
45	18
45	18
45	18
45	18
45	18
45	18
45	18
45	29
45	18
45	18
45	18
45	18
45	18
45	18
45	18
45	18
45	18
45	18
45	18
45	18
45	18
45	18
45	18
45	18
45	20
45	18
45	18
45	18
45	18
45	18
45	18
45	18
45	18
45	18
45	18
45	18
45	18
45	18
45	10
45	18
45	18
45	18
45	18
45	18
45	18
45	29
45	18
45	18
45	29
45	18
45	18
45	18
45	18
45	18
45	18
45	18
45	18
45	18
45	18
45	18
45	18
45	115
45	18
45	18
45	18
45	18
45	18
45	18
45	18
45	18
45	18
45	115
45	18
45	18
45	18
45	18
45	18
45	18
45	18
45	18
45	18
45	18
45	18
45	18
45	18
45	29
45	29
45	18
45	18
45	18
45	101
45	24
45	18
45	18
45	18
45	18
45	18
45	18
45	18
45	18
45	29
45	18
45	18
45	18
45	18
45	18
45	18
45	18
45	901
45	18
45	18
45	18
45	18
45	18
45	18
45	18
45	18
45	-
45	29
45	115
45	758
45	29
45	29
45	637
45	29
45	115
45	115
45	29
45	43
45	29
45	29
45	-
45	115
45	29
45	29
47	118
47	118
47	118
47	118
47	118
47	118
47	118
47	118
47	72
47	118
47	118
47	118
47	118
47	118
47	197
47	118
47	118
47	118
47	118
47	118
47	118
47	118
47	118
47	118
47	118
47	118
47	118
47	118
47	118
47	118
47	118
47	118
47	118
47	118
47	118
47	118
47	118
47	118
47	197
47	118
47	118
47	118
47	118
47	118
47	118
47	118
47	118
47	118
47	118
47	118
47	118
47	118
47	118
47	118
47	118
47	118
47	118
47	118
47	118
47	118
47	24
47	20
47	118
47	118
47	118
47	118
47	118
47	197
47	118
47	1183
47	197
47	118
47	-
47	118
47	118
47	118
47	118
47	118
47	118
47	118
47	118
47	118
47	118
47	118
47	118
47	118
47	118
47	118
47	118
47	118
47	118
47	118
47	197
47	118
47	118
47	118
47	118
47	118
47	118
47	118
47	118
47	118
47	118
47	118
47	118
47	118
47	118
47	118
47	118
47	197
47	197
47	118
47	197
47	118
47	118
47	118
47	118
47	118
47	118
47	197
47	1744
47	118
47	118
47	118
47	118
47	118
47	118
47	118
47	118
47	118
47	118
47	118
47	118
47	118
47	118
47	118
47	118
47	118
47	118
47	118
47	118
47	118
47	118
47	118
47	118
47	118
47	118
47	118
47	118
47	118
