# Supplementary material for: Bioinformatics Analysis of Global Diversity in Meningococcal Vaccine Antigens over the Past 10 Years; Vaccine Efficiency Prognosis
Source: Preprints.org preprint supplement (doi:10.20944/preprints202311.0997.v1), 2023-11-15
Supplement: Supplementary file 3 [file File XLSX S3 the prediction of 4CMenB reactivity of NHBA variants from “Insufficient data” group.xlsx]

## Sheet: Sheet1
3	cross_reactive	cross_reactive	266	271	268.5	0
4	cross_reactive	cross_reactive	80	75	77.5	0
7	none	none				0
8	none	none				0
13	none	none				0
14	none	none				0
16	none	none				0
19	none	none				0
20	none	none				0
21	none	none				0
22	none	none				0
24	none	none				0
25	none	none				0
26	none	none				0
29	none	none				0
33	cross_reactive	cross_reactive				0
34	none	none				0
38	none	none				0
46	none	none				0
53	none	none				0
54	none	none				0
58	none	none				0
81	none	none				0
89	none	none				0
94	cross_reactive	cross_reactive				0
101	none	none				0
111	none	none				0
113	cross_reactive	cross_reactive				0
114	none	none				0
115	none	none				0
116	cross_reactive	cross_reactive				0
117	none	none				0
118	none	none				0
119	none	none				0
129	none	none				0
130	none	none				0
138	none	none				0
142	none	none				0
144	none	none				0
145	none	none				0
150	none	none				0
160	none	none				0
161	cross_reactive	cross_reactive				0
173	none	none				0
180	none	none				0
181	none	none				0
184	none	none				0
187	none	none				0
188	none	none				0
190	none	none				0
191	none	none				0
192	none	none				0
212	cross_reactive	cross_reactive				0
214	none	none				0
215	cross_reactive	cross_reactive				0
220	none	none				0
221	none	none				0
222	none	none				0
227	cross_reactive	cross_reactive				0
231	none	none				0
234	none	none				0
237	none	none				0
239	none	none				0
240	none	none				0
248	none	none				0
251	none	none				0
253	none	none				0
254	none	none				0
255	none	none				0
262	none	none				0
266	none	none				0
276	none	none				0
283	none	none				0
286	none	none				0
289	none	none				0
291	cross_reactive	cross_reactive				0
304	none	none				0
305	none	none				0
306	none	none				0
312	none	none				0
313	none	none				0
316	none	none				0
329	none	none				0
337	none	none				0
350	cross_reactive	cross_reactive				0
354	none	none				0
357	none	none				0
367	none	none				0
376	none	none				0
408	cross_reactive	cross_reactive				0
470	cross_reactive	cross_reactive				0
492	none	none				0
493	none	none				0
503	none	none				0
511	none	none				0
523	none	none				0
526	cross_reactive	cross_reactive				0
550	cross_reactive	cross_reactive				0
552	none	none				0
553	none	none				0
557	none	none				0
558	none	none				0
563	none	none				0
571	cross_reactive	cross_reactive				0
573	none	none				0
593	none	none				0
598	cross_reactive	cross_reactive				0
601	none	none				0
630	none	none				0
634	none	none				0
636	none	none				0
637	none	none				0
643	cross_reactive	cross_reactive				0
649	none	none				0
652	none	none				0
657	none	none				0
668	none	none				0
669	none	none				0
670	none	none				0
671	none	none				0
672	cross_reactive	cross_reactive				0
673	cross_reactive	cross_reactive				0
674	none	none				0
675	none	none				0
676	none	none				0
677	none	none				0
688	none	none				0
697	none	none				0
706	none	none				0
707	none	none				0
712	none	none				0
715	none	none				0
741	none	none				0
742	none	none				0
752	none	none				0
753	none	none				0
755	none	none				0
758	none	none				0
759	none	none				0
761	cross_reactive	cross_reactive				0
762	cross_reactive	cross_reactive				0
763	none	none				0
765	cross_reactive	cross_reactive				0
770	none	none				0
778	cross_reactive	cross_reactive				0
781	none	none				0
783	none	none				0
789	none	none				0
792	none	none				0
793	none	none				0
794	none	none				0
795	none	none				0
796	none	none				0
797	none	none				0
798	none	none				0
799	none	none				0
800	none	none				0
801	none	none				0
802	none	none				0
803	cross_reactive	cross_reactive				0
805	cross_reactive	cross_reactive				0
807	none	none				0
810	none	none				0
816	none	none				0
835	none	none				0
837	none	none				0
843	none	none				0
849	none	none				0
850	none	none				0
851	none	none				0
854	none	none				0
858	none	none				0
860	cross_reactive	cross_reactive				0
861	cross_reactive	cross_reactive				0
863	cross_reactive	cross_reactive				0
865	none	none				0
869	cross_reactive	cross_reactive				0
870	none	none				0
883	none	none				0
884	none	none				0
892	none	none				0
893	none	none				0
897	cross_reactive	cross_reactive				0
900	none	none				0
901	none	none				0
904	none	none				0
910	none	none				0
912	none	none				0
918	none	none				0
921	none	none				0
927	cross_reactive	cross_reactive				0
928	none	none				0
939	none	none				0
942	none	none				0
943	none	none				0
945	none	none				0
948	none	none				0
949	none	none				0
950	none	none				0
951	none	none				0
960	none	none				0
968	none	none				0
970	none	none				0
1049	none	none				0
1052	none	none				0
1059	none	none				0
1070	none	none				0
1073	none	none				0
1086	none	none				0
1088	none	none				0
1092	cross_reactive	cross_reactive				0
1104	none	none				0
1136	none	none				0
1170	cross_reactive	cross_reactive				0
1172	none	none				0
1173	cross_reactive	cross_reactive				0
1175	cross_reactive	cross_reactive				0
1177	none	none				0
1178	cross_reactive	cross_reactive				0
1179	cross_reactive	cross_reactive				0
1180	cross_reactive	cross_reactive				0
1181	none	none				0
1183	none	none				0
1185	cross_reactive	cross_reactive				0
1186	none	none				0
1187	cross_reactive	cross_reactive				0
1188	none	none				0
1203	none	none				0
1204	none	none				0
1205	cross_reactive	cross_reactive				0
1206	none	none				0
1210	none	none				0
1223	cross_reactive	cross_reactive				0
1255	none	none				0
1259	none	none				0
1261	none	none				0
1262	none	none				0
1263	none	none				0
1264	none	none				0
1266	none	none				0
1286	none	none				0
1288	cross_reactive	cross_reactive				0
1296	none	none				0
1298	none	none				0
1304	none	none				0
1318	none	none				0
1322	none	none				0
1329	none	none				0
1332	cross_reactive	cross_reactive				0
1333	cross_reactive	cross_reactive				0
1335	none	none				0
1336	none	none				0
1341	none	none				0
1342	none	none				0
1343	none	none				0
1344	none	none				0
1381	cross_reactive	cross_reactive				0
1383	none	none				0
1385	cross_reactive	cross_reactive				0
1395	none	none				0
1462	cross_reactive	cross_reactive				0
1466	cross_reactive	cross_reactive				0
1468	none	none				0
1469	none	none				0
1470	none	none				0
1471	cross_reactive	cross_reactive				0
1472	none	none				0
1473	none	none				0
1476	none	none				0
1486	cross_reactive	cross_reactive				0
1487	none	none				0
1488	none	none				0
1497	none	none				0
1498	none	none				0
1499	cross_reactive	cross_reactive				0
1500	none	none				0
1511	none	none				0
1585	none	none				0
1588	none	none				0
1589	cross_reactive	cross_reactive				0
1590	none	none				0
1591	none	none				0
1594	none	none				0
1595	none	none				0
1597	none	none				0
1607	none	none				0
1608	none	none				0
1640	cross_reactive	cross_reactive				0
1642	none	none				0
1644	none	none				0
1645	none	none				0
1654	none	none				0
1658	cross_reactive	cross_reactive				0
1661	none	none				0
1662	none	none				0
1663	none	none				0
1666	none	none				0
1681	none	none				0
1707	cross_reactive	cross_reactive				0
1716	none	none				0
1718	none	none				0
1719	none	none				0
1720	none	none				0
1721	none	none				0
1722	cross_reactive	cross_reactive				0
1723	cross_reactive	cross_reactive				0
1724	cross_reactive	cross_reactive				0
1725	cross_reactive	cross_reactive				0
1726	none	none				0
1733	none	none				0
1734	none	none				0
1741	none	none				0
1742	none	none				0
1743	none	none				0
1744	none	none				0
1748	cross_reactive	cross_reactive				0
1761	none	none				0
1762	cross_reactive	cross_reactive				0
1763	none	none				0
1773	none	none				0
1774	cross_reactive	cross_reactive				0
1775	none	none				0
1777	cross_reactive	cross_reactive				0
12	cross_reactive	none				12
44	none	cross_reactive				44
72	cross_reactive	none				72
122	none	cross_reactive				122
249	cross_reactive	none				249
379	none	cross_reactive				379
465	cross_reactive	none				465
471	none	cross_reactive				471
513	cross_reactive	none				513
596	cross_reactive	none				596
645	cross_reactive	none				645
760	cross_reactive	none				760
819	none	cross_reactive				819
833	cross_reactive	none				833
855	cross_reactive	none				855
894	none	cross_reactive				894
907	cross_reactive	none				907
1060	cross_reactive	none				1060
1105	none	cross_reactive				1105
1315	cross_reactive	none				1315
1508	none	cross_reactive				1508
1641	cross_reactive	none				1641
1660	none	cross_reactive				1660
	one-hot-encoding	label-encoding
