# Supplementary figures and images for: Bioinformatics Analysis of Global Diversity in Meningococcal Vaccine Antigens over the Past 10 Years; Vaccine Efficiency Prognosis
Source: Preprints.org preprint supplement (doi:10.20944/preprints202311.0997.v1), 2023-11-15

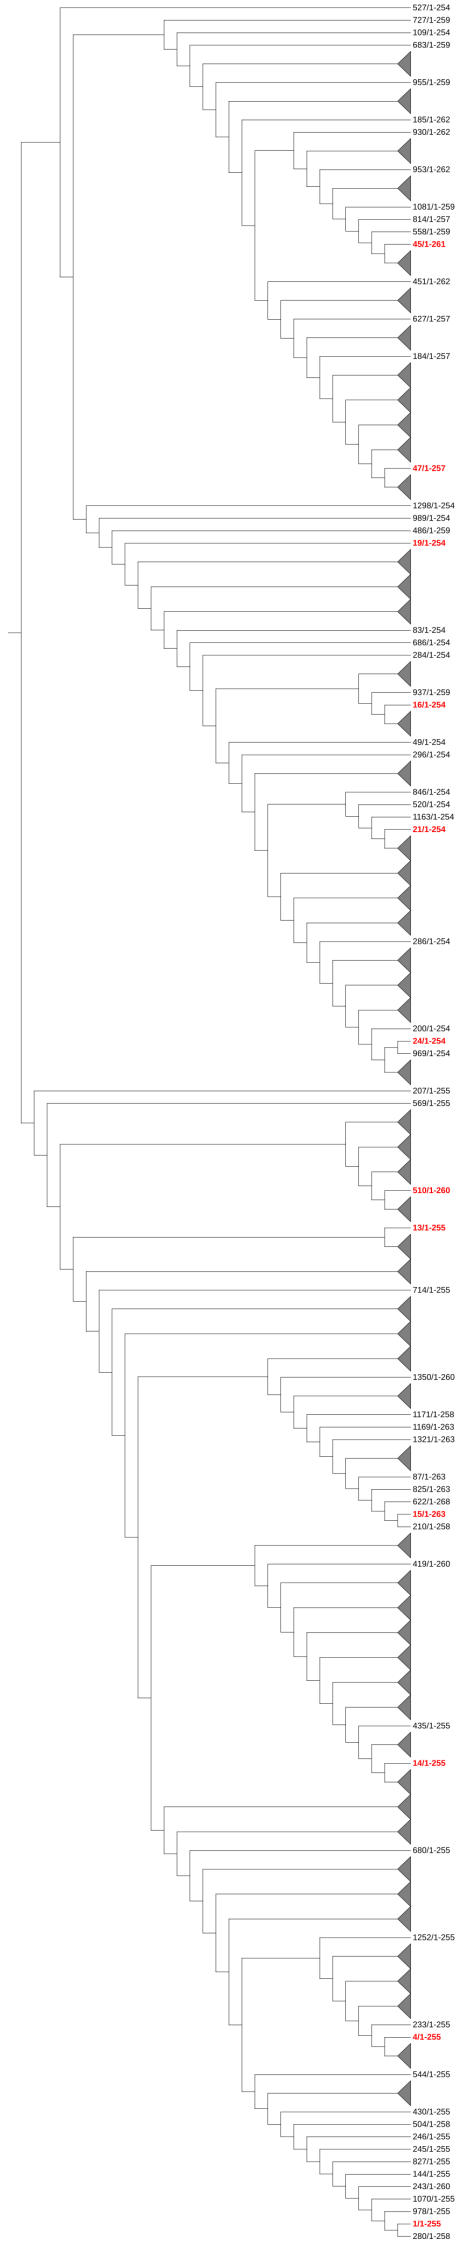

Supplement: Supplementary file 1 [file supplementary]

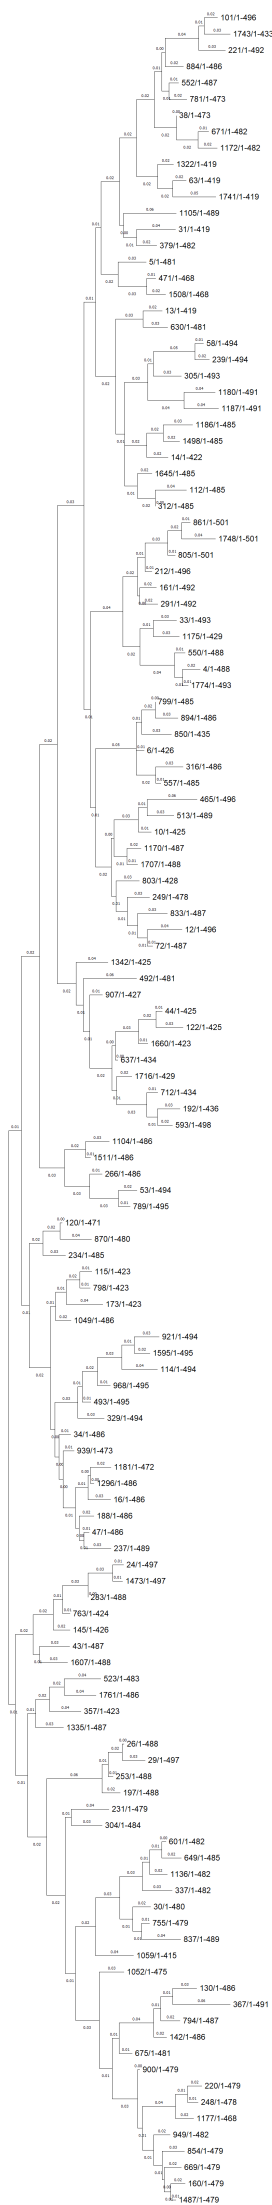

Supplement: Supplementary file 2 [file supplementary]
